# Supplementary material
Source: PubMed Central journal article supplement (PMC6491662)
Supplement: NIHMS1025754-supplement-SI.pdf [file NIHMS1025754-supplement-SI.pdf]

# Supporting Information

## Total enzyme syntheses of napyradiomycins A1 and B1

Shaun M. K. McKinnie,<sup>†‡</sup> Zachary D. Miles,<sup>†‡</sup> Peter A. Jordan,<sup>†</sup> Takayoshi Awakawa,<sup>†§</sup> Henry P. Pepper,<sup>^</sup> Lauren A. M. Murray,<sup>^</sup> Jonathan H. George,<sup>^</sup> and Bradley S. Moore.<sup>†\*⊥</sup>

<sup>†</sup>Center for Marine Biotechnology and Biomedicine, Scripps Institution of Oceanography, University of California San Diego, La Jolla, CA 92093, USA.

<sup>^</sup>Department of Chemistry, University of Adelaide, Adelaide, SA 5005, Australia.

<sup>⊥</sup>Skaggs School of Pharmacy and Pharmaceutical Sciences, University of California San Diego, La Jolla, CA 92093, USA.

\*bsmoore@ucsd.edu

<sup>‡</sup>authors contributed equally

## Table of Contents

|                                                                                                         |            |
|---------------------------------------------------------------------------------------------------------|------------|
| <b>1. Experimental procedures</b>                                                                       | <b>S3</b>  |
| <b>2. Figures</b>                                                                                       | <b>S8</b>  |
| <b>Figure S1.</b> The gene sequence of NapH4 used in this study.                                        | S8         |
| <b>Figure S2.</b> SDS-PAGE of purified NapT9 and NapH4.                                                 | S9         |
| <b>Figure S3.</b> Monochlorodimedone assays on recombinant His <sub>6</sub> -NapH4-Strep.               | S10        |
| <b>Figure S4.</b> Isolated napyradiomycin B molecules with proposed NapH4 mechanism and pH dependence.  | S11        |
| <b>Figure S5.</b> NapT9 requirements and substrate specificity.                                         | S13        |
| <b>Figure S6.</b> Comparison of NapH1 and NapH4 conversion of 4-geranyl THN ( <b>4</b> ) to <b>5</b> .  | S14        |
| <b>Figure S7.</b> One-pot optimization to napyradiomycin molecules and biosynthetic intermediates       | S16        |
| <b>Figure S8.</b> Optimized one-pot napyradiomycin biosynthesis and comparison to isolated standards.   | S18        |
| <b>Table S1.</b> Sequence similarity/identity comparison of napyradiomycin VHPO homologs.               | S19        |
| <b>Table S2.</b> Sequence similarity/identity comparison of napyradiomycin aromatic prenyltransferases. | S19        |
| <b>3. NMR spectra</b>                                                                                   | <b>S20</b> |
| Labeling scheme for napyradiomycins A1 ( <b>2</b> ) and B1 ( <b>3</b> )                                 | S20        |
| <b>Table S3.</b> <sup>1</sup> H comparison table of enzymatic and isolated napyradiomycins              | S21        |
| <b>Table S4.</b> <sup>13</sup> C comparison table of enzymatic and isolated napyradiomycins             | S22        |
| NMR spectra for one-pot isolated compound <b>5</b>                                                      | S23        |
| NMR spectra for one-pot isolated napyradiomycin A1 ( <b>2</b> )                                         | S25        |
| NMR spectra for one-pot isolated napyradiomycin B1 ( <b>3</b> )                                         | S27        |
| <b>4. Supporting Information References</b>                                                             | <b>S29</b> |

# Experimental Procedures

## Materials and methods

All chemicals used were purchased from commercial suppliers (Acros, Sigma Aldrich, Fluka, Oakwood or Alfa Aesar) and used as received unless otherwise noted. Analytical grade solvents were purchased and used without further purification. NMR spectra were recorded on a Bruker Avance III spectrometer (600 MHz) using either a 1.7 mm inverse detection triple resonance (H-C/N/D) cryoprobe or a 5 mm inverse detection triple resonance (H-C/N/D) cryoprobe, or a JEOL spectrometer (500 MHz) in the solvents indicated. Chemical shifts signals ( $\delta$ ) are reported in ppm and are referenced to the internal chloroform ( $\delta = 7.26$  ppm for  $^1\text{H}$ ,  $\delta = 77.2$  ppm for  $^{13}\text{C}$ ), or acetone signal at ( $\delta = 2.05$  ppm for  $^1\text{H}$ ,  $\delta = 29.8$  ppm for  $^{13}\text{C}$ ). Data for NMR spectra was reported as follows: s = singlet, d = doublet, t = triplet, q = quartet, m = multiplet or unresolved, br = broad signal,  $J$  = coupling constant(s) in Hz. All  $J$  values were rounded to the nearest 0.1 Hz. High-resolution ESI mass spectra were recorded on an Agilent-6230 TOF LC-MS.

LC-MS was carried out on an Agilent Technologies 1200 Series system with a diode-array detector coupled to an Agilent Technologies 6530 Accurate-Mass Q-TOF mass spectrometer in negative ion mode. Analytes were separated by reversed-phase chromatography on an Agilent Technologies Eclipse XDB-C18, 5 $\mu\text{m}$ -150 x 4.6 mm column at a flow rate of 0.75 mL/min with a mobile phase combination of water + 0.1% formic acid (A) and acetonitrile + 0.1% formic acid (B) using a gradient as follows: 10% to 100% (B), 0 to 20 min; 100% (B), 20 to 24 min; 100% to 10% (B), 24 to 27 min; 10% (B), 27 to 30 min. Semi-preparative HPLC was carried out on an Agilent Technologies 1200 Series system with a multiple wavelength detector using the methods described in the respective sections.

## Chemical synthesis

All organic substrates (THN (**1**),<sup>1</sup> GPP,<sup>2</sup> DMAPP<sup>2</sup>) and napyradiomycin biosynthetic intermediates (**4**,<sup>3</sup> **5**,<sup>4</sup> **6**,<sup>4</sup> and **7**)<sup>4</sup> were synthesized following established literature protocols and matched previous spectral characterization.

## Cloning, heterologous expression, and purification of previously characterized Nap enzymes

NapH1,<sup>5</sup> NapT8,<sup>4</sup> and NapH3<sup>4</sup> were cloned, expressed, and purified as previously described.

### Cloning of *Streptomyces* sp. CNQ-525 *napH4* and *napT9*

The open reading frame encoding *Streptomyces* sp. CNQ-525 NapH4 (see Figure S1 for complete gene sequence used in this study) was amplified from chromosomal DNA by PCR using the following primers: 5'-ATAGGATCCATGACGACATCCGGACACACC-3' (forward), and 5'-AATACTCGAGGCCGTCGCCCTCGCCCTTG-3' (reverse) at an annealing temperature of 64 °C. The resulting PCR product was digested with the restriction enzymes XhoI and NdeI, and subsequently ligated into the similarly digested vector pASK-IBA43plus (IBA) for expression of a NapH4 containing an N-terminal His<sub>6</sub>-tag and a C-terminal Strep-tag II. For expression in *Streptomyces*, the *napH4* gene, with flanking tags described above, was amplified from pASK-IBA43plus:*napH4* using the following primers: 5'-TGAAAGGAATGAGCATATGGCTAGCAGAGGATCGC-3' (forward), 5'-GAACTAGTGCTAGCAAGCTTATTATTTTCGAACTGCGGGTG-3' (reverse). The amplified fragments were assembled with the vector pHSA81<sup>6</sup> (previously linearized by digestion with NdeI and HindIII) using Gibson Master Mix (New England Biolabs) and the corresponding Gibson cloning protocol provided by the manufacturer.

The open reading frame encoding *Streptomyces* sp. CNQ-525 NapT9 (protein accession number: ABS50490) was amplified from chromosomal DNA by PCR using the following primers: 5'-ATACATATGTCCGGAGCTACTGGGGCGG-3' (forward), and 5'-ATAGGATCCTCACGAGGCTTGGCCTTCTTCCGC-3' (reverse) at an annealing temperature of 70 °C.

The resulting PCR product was digested with the restriction enzymes NdeI and BamHI, and subsequently ligated into the similarly digested vector pET28a (Novagen) for expression of His<sub>6</sub>-NapT9.

#### **Expression of NapH4 in *Streptomyces lividans* TK23**

The pHSA81:*napH4* vector was introduced into *S. lividans* TK23 by the standard protoplast-PEG method.<sup>7</sup> Spores of *S. lividans* TK23 harboring pHSA81:*napH4* were then spread onto a Bennett's maltose plate containing 40 µg/ml of thiostrepton, and grown at 30 °C until sporulation was apparent. Approximately 4 cm<sup>2</sup> cuttings of the sporulated plate were used to inoculate 10-50 mL flasks (containing springs for added aeration, one cutting/flask) of yeast extract/malt extract liquid medium (1.0% glucose, 34% sucrose, 0.3% yeast extract, 0.3% malt extract, 0.5% bacto peptone, 0.1% MgCl<sub>2</sub>·6H<sub>2</sub>O, pH 7.0) including 10 µg/ml of thiostrepton at 28 °C for ~5 days (until cells became dense). Cells were harvested by centrifugation (5000 × g) for 20 min, washed once with buffer A (see NapH4 purification for buffer components), then centrifuged again as before. The pellet was then used directly for purification as described.

#### **Expression of NapT9 in *Escherichia coli***

*E. coli* BL21-Gold(DE3) cells (Agilent Technologies) containing the pET28a:*napT9* vector were grown in 4 L of TB broth containing 50 µg/mL kanamycin at 37 °C until an OD<sub>600</sub> of approximately 0.5, at which time the temperature was lowered to 18 °C. Cells were then grown to an OD<sub>600</sub> of approximately 0.6-0.8 and expression was induced by addition of 0.1 mM IPTG (final concentration). Cells were grown overnight at 18 °C, harvested the next day by centrifugation (5000 × g), and the pellets reserved and frozen at -80 °C.

#### **Purification of NapH4**

The cell pellet from ~500 mL of growth was resuspended in ~100 mL of a solution containing 50 mM Tris-HCl pH 8.0, 0.5 M NaCl, and 40 mM imidazole (buffer A), with additional 1 mM phenylmethanesulfonyl fluoride and 1 mg/mL lysozyme added (both final concentrations, added as solids). The solution was then sonified on ice with constant stirring using a Branson digital sonifier (40% amplitude), 15 sec pulse on/45 seconds pulse off, for 12 total min "on" time. The lysate was centrifuged for 30 min at 18000 × g to pellet insoluble material and the supernatant was passed through a 0.8 µm filter. The cleared lysate was then loaded onto a 5 mL HisTrap FF column (GE Healthcare) equilibrated prior in buffer A. The column was washed with 50 mL of buffer A, and the target protein was eluted in a linear gradient of 0-100% buffer B (buffer A containing 0.5 M imidazole) over 75 mL. Fractions containing the target protein were identified by SDS-PAGE, pooled, and concentrated to <2 mL total volume using an Amicon Ultra-15 10 kDa cutoff concentrator (Millipore) by centrifugation at 3500 × g, 4 °C. The concentrated protein was then loaded onto a Superdex 200 gel filtration column (16 cm × 60 cm, GE Healthcare) equilibrated prior in 25 mM HEPES-NaOH pH 8.0, 300 mM NaCl, and 10% glycerol, and eluted at a constant flow rate of 1.0 mL/min. Fractions containing the target protein were identified using SDS-PAGE, pooled, and concentrated as described above. Protein aliquots were frozen on dry ice and stored at -80 °C. The protein concentration was determined using the Bradford method using bovine serum albumin as a standard.

#### **Purification of NapT9**

The cell pellet from ~3 L of growth was resuspended in ~100 mL of a solution containing 50 mM Tris-HCl pH 8.0, 0.5 M NaCl, and 25 mM imidazole (buffer A2), with additional 1 mM phenylmethanesulfonyl fluoride added (final concentration, added as solid). The solution was then sonified on ice with constant stirring using a Branson digital sonifier (40% amplitude), 15 sec pulse on/45 seconds pulse off, for 12 total min "on" time. The lysate was centrifuged for 30 min at 18000 × g to pellet insoluble material. The cleared lysate was then loaded onto a 5 mL HisTrap FF column (GE Healthcare) equilibrated prior in buffer A2. The column was washed with 50 mL of buffer A2, and the target protein

was eluted in a linear gradient of 0-100% buffer B2 (buffer A2 containing 0.5 M imidazole) over 75 mL. Fractions containing the target protein were identified by SDS-PAGE, pooled, and concentrated to <2 mL total volume using an Amicon Ultra-15 10 kDa cutoff concentrator (Millipore) by centrifugation at 3500 × g, 4 °C. The concentrated protein was then loaded onto a Superdex 75 gel filtration column (16 cm × 60 cm, GE Healthcare) equilibrated prior in 25 mM HEPES-NaOH pH 8.0, 300 mM NaCl, and 10% glycerol, and eluted at a constant flow rate of 1.0 mL/min. Fractions containing the target protein were identified using SDS-PAGE, pooled, and concentrated as described above. Protein aliquots were frozen on dry ice and stored at -80 °C. The protein concentration was determined using the Bradford method using bovine serum albumin as a standard.

#### **Monochlorodimedone (MCD) assay on NapH4 – pH experiments**

This procedure followed previously established literature protocols.<sup>3,8</sup> The absorbance at 290 nm of a 1 mL solution of 50 mM MES-NaOH, pH 6.0, 200 mM KCl and 10 μM sodium orthovanadate in a quartz cuvette was initially set to zero (Cary 60 UV-Vis spectrophotometer, Agilent). To a 1 mL solution of 50 mM buffer (either MES-NaOH, pH 6.0 or HEPES-NaOH, pH 8.0), 200 mM KCl, 50 μM monochlorodimedone, and 10 μM sodium orthovanadate, His<sub>6</sub>-NapH4-Strep (10 μg) was added and transferred to a quartz cuvette. The absorbance at 290 nm of the solution was recorded every 1 second using a kinetic scanning program for 2 minutes to obtain a baseline absorbance. At 2 minutes, 1 mM hydrogen peroxide (final concentration) was added and monitored for 5 additional minutes. After no noticeable decrease in absorbance was observed, 200 mM KBr (final concentration) was added and monitored for an additional 8 minutes.

#### **Monochlorodimedone (MCD) assay on NapH4 – vanadium dependency**

To a 1 mL solution of 50 mM MES-NaOH, pH 6.0, 200 mM KCl, 200 mM KBr, 50 μM monochlorodimedone, and 1 mM hydrogen peroxide, His<sub>6</sub>-NapH4-Strep (10 μg) was added and transferred to a quartz cuvette. The absorbance at 290 nm of the solution was recorded every 1 second using a kinetic scanning program for 2 minutes to obtain a baseline absorbance. After no noticeable decrease in absorbance was observed, 10 μM sodium orthovanadate (final concentration) was added and monitored for 8 additional minutes.

#### **NapH4 *in vitro* activity and requirement assays**

Unless noted, assays (0.1 mL) contained 50 mM HEPES-NaOH (pH 8.0) or 50 mM MES (pH 6.0), 150 mM KCl, 0.1 mM Na<sub>3</sub>VO<sub>4</sub>, 2.0 mM H<sub>2</sub>O<sub>2</sub>, 0.25 mM napyradiomycin A1 (**2**), and initiated by addition of 5 μM NapH4. Reactions were allowed to incubate for 30 min at room temperature, and quenched by EtOAc extraction (1.0 mL, twice). The solvent was evaporated, and the residue was brought up in 0.1 mL MeOH. 25 μL was injected onto the LC-MS and analyzed as described in the analysis section. All control reactions were conducted with water in place of enzyme and all standards were dissolved in MeOH to the same concentration present in the respective assays prior to direct analysis on the LC-MS.

#### **Preparative scale reaction of napyradiomycin B1 (**3**)**

A 5.0 mL reaction containing 50 mM HEPES-NaOH pH 8.0, 150 mM KCl, 0.1 mM M Na<sub>3</sub>VO<sub>4</sub>, 4.0 mM H<sub>2</sub>O<sub>2</sub>, 5% glycerol, and 2.0 mg of napyradiomycin A1 (**2**) dissolved in 100 μL DMSO was initiated by addition of ~2 mg of NapH4. The reaction was then gently stirred at room temperature for ~3 h. The reaction was quenched by extraction with EtOAc (3x) and the solvent was removed. The crude mixture was resuspended in methanol and purified by reversed-phase chromatography on a semi-preparative HPLC using a Phenomenex Luna C18(2), 5μm-250 x 10 mm column at a flow rate of 2.5 mL/min with a mobile phase combination of water + 0.1% trifluoroacetic acid (A) and acetonitrile + 0.1% trifluoroacetic acid (B) using a 90% (B) isocratic elution. The solvent was removed and the compound was further purified by silica flash chromatography (2:1 hexanes:EtOAc) to remove HPLC grease and concentrated *in vacuo*, isolating **3** (1.9 mg, 89%) as a light orange solid.

### **NapT9 and NapT9/NapH1 coupled *in vitro* activity and requirement assays**

Unless noted, assays (0.1 mL) contained 50 mM HEPES-NaOH pH 8.0, 150 mM KCl, 10 mM MgCl<sub>2</sub>, 1.0 mM geranyl pyrophosphate ammonium salt (dimethylallyl pyrophosphate ammonium salt or isopentenyl pyrophosphate trilithium salt used as indicated), 5.0 mM dithiothreitol (DTT), 1.0 mM THN (**1**), and were initiated by addition of 20 μM NapT9. Reactions conducted without MgCl<sub>2</sub> also contained 5.0 mM ethylenediaminetetraacetic acid (EDTA). Reactions were allowed to incubate for 1 h at room temperature, and quenched by EtOAc extraction (1.0 mL, twice). If analyzed by LC-MS, the residue from the reaction was suspended in 0.1 mL MeOH. Otherwise the residue was resuspended in 2 μL DMSO for the subsequent NapH1 reaction. NapH1 assays (0.1 mL) contained 50 mM HEPES-NaOH pH 8.0, 150 mM KCl, 0.1 mM Na<sub>3</sub>VO<sub>4</sub>, 7.0 mM H<sub>2</sub>O<sub>2</sub>, and the NapT9 reaction extract resuspended in 2 μL DMSO, and were initiated by the addition of 20 μM NapH1. The reaction was then allowed to incubate at room temperature for 2 h and was quenched by EtOAc extraction as described above. For the NapH1 reactions using synthetic 4-geranyl THN (**4**) as a substrate, assays (0.1 mL) contained 50 mM HEPES-NaOH pH 8.0, 150 mM KCl, 2.0 mM H<sub>2</sub>O<sub>2</sub>, 0.1 mM Na<sub>3</sub>VO<sub>4</sub>, and 0.5 mM 4-geranyl THN (**4**), and were initiated by addition of 20 μM NapH1. The reaction was then allowed to incubate at room temperature for 2 h and then quenched by EtOAc extraction as described above. For LC-MS analysis, the residue was brought up in 0.1 mL MeOH, and 25 μL was injected and analyzed as described in the analysis section. All control reactions were conducted with water in place of enzyme, and all standards were dissolved in MeOH to the same concentration present in the respective assays prior to direct analysis on the LC-MS.

### **Preparative scale reaction of NapT9/NapH1 product **5****

A 10 mL solution containing 50 mM HEPES-NaOH pH 8.0, 100 mM KCl, 10 mM MgCl<sub>2</sub>, and 5.0 mM DTT was sparged with argon for 30 min, followed by addition of geranyl pyrophosphate trisammonium salt (0.095 g, 0.26 mmol), and THN (**1**) (0.010 g, 0.052 mmol) dissolved in 100 μL DMSO. The reaction was initiated by addition of ~7 mg of NapT9 and gently stirred at room temperature for ~24 h under a constant stream of argon. Next, 7.0 mM H<sub>2</sub>O<sub>2</sub>, 0.1 mM Na<sub>3</sub>VO<sub>4</sub>, and ~2 mg of NapH1 were added and the reaction was allowed to proceed for an additional 8 h. The reaction was quenched by extraction with EtOAc (3x) and the solvent was removed. The crude mixture was resuspended in methanol and purified by reversed-phase chromatography on a semi-preparative HPLC using a Phenomenex Luna C18(2), 5μm-250 x 10 mm column at a flow rate of 2.5 mL/min with a mobile phase combination of water + 0.1% trifluoroacetic acid (A) and acetonitrile + 0.1% trifluoroacetic acid (B) using a gradient as follows: 10% to 100% (B), 0 to 20 min; 100% (B), 20 to 27 min; 100% to 10% (B), 27 to 30 min; 10% (B), 30 to 33 min. The solvent was removed, and the compound was further purified by silica flash chromatography (3:1 DCM:MeOH). The solvent was once again removed resulting in ~1-2 mg of compound.

### **General procedure for the one-pot preparation of napyradiomycin biosynthetic intermediates and compounds **5**, **2**, and **3**.**

Step 1: The initial starting solution for one-pot napyradiomycin assays (50 mM HEPES-KOH (pH 8.0), 150 mM KCl, 5% glycerol, 10 mM MgCl<sub>2</sub>, 5 mM DTT) was portioned into 1 mL aliquots in 2 mL microcentrifuge tubes and bubbled with Ar gas for 20 seconds. This was followed by the sequential addition of: 50 μM His<sub>6</sub>-NapT9; 5.5 mM GPP; 5.0 mM THN (as a freshly prepared DMSO solution); and 0.1 units of *E. coli* inorganic pyrophosphatase (New England Biolabs). The reaction mixture was covered with Ar gas, sealed with parafilm and left at room temperature for 14 h.

Step 2: Following overnight incubation, aqueous solutions of 0.1 mM Na<sub>3</sub>VO<sub>4</sub>, 10 μM His<sub>8</sub>-NapH1, and 5 mM H<sub>2</sub>O<sub>2</sub> were sequentially added to the reaction mixture. After 30 minutes, an additional 20 mM H<sub>2</sub>O<sub>2</sub> was added, and the reaction mixture was incubated for an additional 5.5 h.

Step 3: To the reaction mixture was sequentially added: 5.5 mM DMAPP; 30 μM His<sub>6</sub>-NapT8; 50 μM His<sub>6</sub>-NapH3; 10 μM His<sub>8</sub>-NapH1; 10 μM His<sub>6</sub>-NapH4-Strep; and 20 mM H<sub>2</sub>O<sub>2</sub>. This solution was then incubated for 4 h. Individual reactions were pooled together, quenched with an equal volume of 1%

v/v formic acid in acetonitrile, and vortexed to mix thoroughly. Precipitated protein was pelleted by centrifugation (4000 x g, 5 minutes, 25 °C), and rinsed with additional 1% formic acid in acetonitrile. The decanted supernatant was pooled and concentrated *in vacuo* to remove acetonitrile. The reaction mixture was adjusted to pH ~3 and extracted with chloroform (3 x 25 mL) and ethyl acetate (3 x 25 mL). Pooled organic layers were dried over Na<sub>2</sub>SO<sub>4</sub>, filtered, and concentrated *in vacuo*. Napyradiomycin biosynthetic intermediates (**5**, **2**, or **3**) were purified by reversed-phase chromatography on a semi-preparative HPLC using a Phenomenex Luna C8(2) 5µm-250 x 10 mm column at a flow rate of 3 mL/min using the following method: 50% B (3 min), 50 – 100% B (10 min), 100% B (7 min), 100 – 50% B (2 min), 50% B (3 min), where A = 0.1% aqueous trifluoroacetic acid and B = 0.1% trifluoroacetic acid in acetonitrile. Isolated compounds (9.5, 17.5, and 17.9 min retention times for **5**, **2**, and **3** respectively) were concentrated *in vacuo* and further purified by a small pipette silica column to remove HPLC grease as described in previous sections.

(S,E)-3-chloro-1-(3,7-dimethylocta-2,6-dien-1-yl)-1,4,5,7-tetrahydroxynaphthalen-2(1H)-one (**5**):

THN (**1**) (5.8 mg, 30 µmol, divided over 6 x 1 mL) was subjected to only steps 1 and 2 of the general procedure, isolating **5** (5.1 mg, 45%) as a light brown solid. Characterization closely matched that of synthetic **5**<sup>3,4</sup>:  $[\alpha]_D^{26} = +4.1$  (c 0.5 MeOH); <sup>1</sup>H NMR (600 MHz, d<sub>6</sub>-acetone) δ 8.72 (s, 1H), 6.59 (d, *J* = 2.2 Hz, 1H), 6.14 (d, *J* = 2.1 Hz, 1H), 5.03 (t, *J* = 7.3 Hz, 1H), 4.81 (t, *J* = 8.0 Hz, 1H), 2.96 – 2.92 (m, 1H), 2.46 (dd, *J* = 13.3, 7.5 Hz, 1H), 1.92 (dt, *J* = 7.7, 7.7 Hz, 2H), 1.78 (t, *J* = 8.2 Hz, 2H), 1.62 (s, 3H), 1.56 (s, 3H), 1.27 (s, 3H); HRMS (ESI) calculated for C<sub>20</sub>H<sub>22</sub><sup>35</sup>ClO<sub>5</sub> 377.1161, found 377.1159.

napyradiomycin A1 (**2**):

THN (**1**) (9.6 mg, 50 µmol, divided over 10 x 1 mL) was subjected to all steps of the general procedure except omitting His<sub>6</sub>-NapH4-Strep, isolating **2** (5.4 mg, 22%) as a light orange solid. Characterization closely matched that of isolated **2**<sup>9</sup> (see Tables S1 and S2 for comparison):  $[\alpha]_D^{26} = +47$  (c 0.5 EtOH); <sup>1</sup>H NMR (600 MHz, CDCl<sub>3</sub>) δ 11.83 (s, 1H), 7.16 (d, *J* = 2.5 Hz, 1H), 6.70 (d, *J* = 2.4 Hz, 1H), 6.14 (br s, 1H), 4.94 – 4.87 (m, 1H), 4.71 (t, *J* = 7.9 Hz, 1H), 4.43 (dd, *J* = 11.7, 4.2 Hz, 1H), 2.70 (d, *J* = 8.2 Hz, 2H), 2.48 (dd, *J* = 14.2, 4.3 Hz, 1H), 2.42 (dd, *J* = 14.2, 11.7 Hz, 1H), 1.66 – 1.60 (m, 7H), 1.51 (s, 3H), 1.50 (s, 3H), 1.32 (s, 3H), 1.18 (s, 3H); HRMS (ESI) calculated for C<sub>25</sub>H<sub>29</sub><sup>35</sup>Cl<sub>2</sub>O<sub>5</sub> 479.1398, found 479.1394.

napyradiomycin B1 (**3**):

THN (**1**) (9.6 mg, 50 µmol, divided over 10 x 1 mL) was subjected to all steps of the general procedure, isolating **3** (4.6 mg, 18%) as an orange solid. Characterization closely matched that of isolated **3**<sup>9</sup> (see Tables S1 and S2 for comparison):  $[\alpha]_D^{26} = -46$  (c 0.5 MeOH); <sup>1</sup>H NMR (600 MHz, CDCl<sub>3</sub>) δ 12.04 (s, 1H), 7.14 (d, *J* = 2.5 Hz, 1H), 7.10 (br. s, 1H), 6.73 (d, *J* = 2.5 Hz, 1H), 4.78 (d, *J* = 1.4 Hz, 1H), 4.75 (s, 1H), 4.45 (dd, *J* = 12.0, 4.0 Hz, 1H), 3.80 (dd, *J* = 11.6, 4.4 Hz, 1H), 2.64 (dd, *J* = 15.5, 8.7 Hz, 1H), 2.52 (dd, *J* = 14.1, 3.9 Hz, 1H), 2.35 (dd, *J* = 14.1, 12.0 Hz, 1H), 2.24 (ddd, *J* = 13.2, 4.2, 4.2 Hz, 1H), 2.03 (ddd, *J* = 12.7, 4.6, 3.5 Hz, 1H), 1.99 (d, *J* = 8.6 Hz, 1H), 1.92 (td, *J* = 13.3, 13.3, 4.9 Hz, 1H), 1.75 – 1.68 (m, 1H), 1.61 (d, *J* = 15.2 Hz, 1H), 1.38 (s, 3H), 1.19 (s, 3H), 0.71 (s, 3H), 0.58 (s, 3H); HRMS (ESI) calculated for C<sub>25</sub>H<sub>28</sub><sup>35</sup>Cl<sub>3</sub>O<sub>5</sub> 513.1008, found 513.1010.

ATGACGACATCCGGACACACCTCTGTCTCAGACTTCTCGCTGGGCCGCAGATCGCTGCTGGTTCGGCGGCG  
CCTCGGCCGCGTCGCTGTCCATGCTGTCGTTGTCCCGCCCCGCTGCCGCCGCCACCGGCGATGAGCCGCC  
CGAGCTGCCCCGACCTGGACAAGGACAACACTACATCAAGTGGGCCAGCCCACCGGCGCGCGGACCGGTCAG  
TCGGCCAGCGACGCGTTCATCGGCTCGATGGACGTGACCCTCATCCTGTTTCATGAACCGCGCGGCGATGC  
TGGCGTGTTCGACGCGCTGGCGCGTACCACGAGACGGCGGTTCGGCATCCACAGCCAGATCCCAGCGCCG  
CCCCCAGCGAGTCGGCGACCAACCGGAACATGAACATCGCCTGTATCCACGCTCAGAACGCCATCTGG  
AGCCGTCTGCTGCCGCCTATCGTGGCGGGCCTGCGGGAACGTGATGGTCGCGCTCGGCCTGGACCCCGACG  
ACAAGTCGGAGGACGTGACCACCCCGGTTCGGCATTCGGCAACGTGGCGGCCAAGGCCGTCTGGAACGTCCT  
GAAGAACGACGGCATGAACGTCCTCGGCCACGAGGGCGGCCGCAAGTACAACCCCGGCCCTGGGCGGAC  
TACACCGGCTACGTGCCGACGAACACCGCCTTCAAGCTGAACAACCCCTCGCGCTGGCAGCCGCAGCTCC  
AGGCCACAACGGCCGCGCGCCGGCGGCCCGGCCGACCTGGGCATCTACGTCACCCAGCACTTCGT  
GACCCCGCAGATCGCGGTGACCCTGCCGCACATCTTCAAGGACCCGACCGCGTTCCTCGCTTCCCCGGCCC  
GACTTCACGGACCACACCGACCGCCGCGCCTACAAGCGCTCCGTGGACGAGATCATCGAGGCGTCCGCCG  
CGCTCGACGACGAGCGCAAGGCGCTCGCCGAGATCATGGAGAACAAGCTCTGGGGCATCGGCCACTCGTC  
CATCGAGATCGGCCTGAAGAACGACCAGAACAACGAGCTGGGCGTGCACGGCTGGGCGCAGTGGATGCTC  
CAGCACATCCTGGCGACCTTCGACACGCTGATCGCCGCCTGGGGATACAAGCGCAAGTACGAAGCCGTGC  
GGCCGATCACCGCGGTCAGGCACGTGTACGGCAACCGCAAGATCCGCGCCTGGGGCGGCGTTCGGCATGGG  
CACGGTCGACGACATCCCAGCAACGAGTGGGCCGGTACCTGCCGGTGGGCGACCACCCGGAGTACCCG  
TCGGGCTCTACCACCGTGGGCTCCGCCGCCTCGCAGGCGGCGCGGCGTTCCTTCGACTCCGACGACCTGA  
ACTGGGAGTTCGACTTCGAGGTTCGGCAAGTCCATCGTGGAGCCGGGCATCACCCCGTTCGAGAACGTCCG  
GGTGAGCTTCCCACCTGGACCGACTTCAACAAGAGGTGCGCCTACAGCCGCTGGACGGCGGCGTGCAC  
TTCAAGAAGACGGTCGAGCGGTCCATGGCGTTCGGCGAGCAGTTCGGCGACCTGGCCCACGACTTCATAC  
AGCGGCACGTCAAGGGCGAGGGCGACGGCTGA

**Figure S1.** The gene sequence of NapH4 used in this study. A putative open reading frame in the region of the originally annotated *napH4* was predicted using GeneMark.<sup>10</sup> The expressed open reading frame from 23449 bp to 25020 bp (encoding NapH4) in the *Streptomyces* sp. CNQ-525 *nap* cluster resulted in soluble, functional protein used in this study.



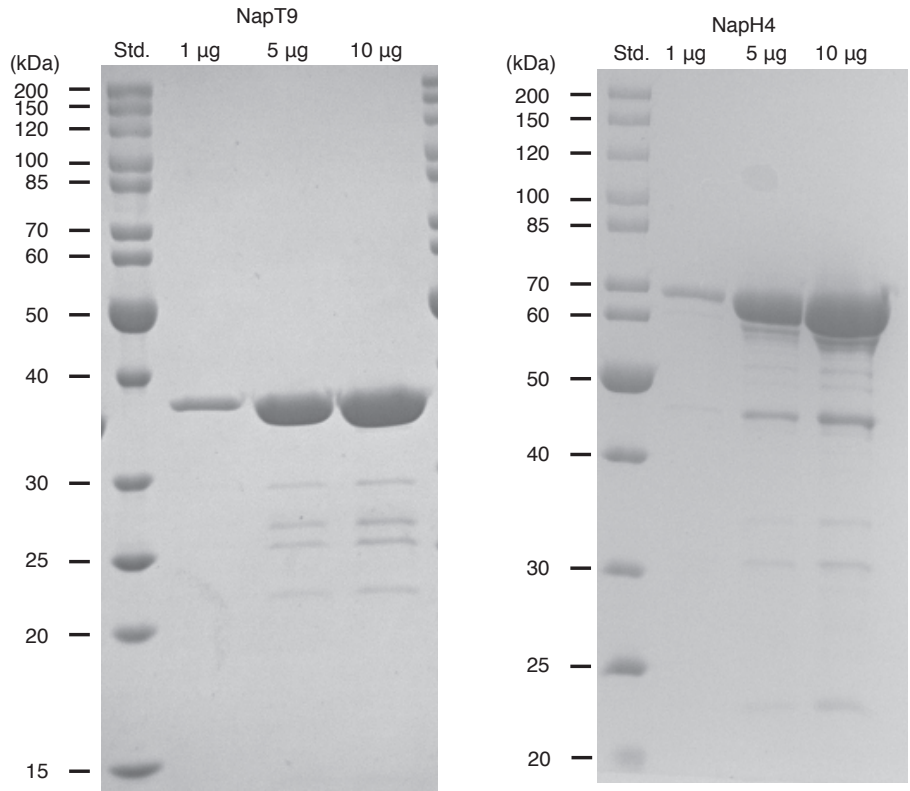

**Figure S2.** SDS-PAGE gels (12%) of purified NapT9 and NapH4. The bands are consistent with the predicted molecular weights of His<sub>6</sub>-NapT9 (35.0 kDa), and His<sub>6</sub>-NapH4-Strep (62.7 kDa). Both proteins were judged to be >80% pure based on band intensities.

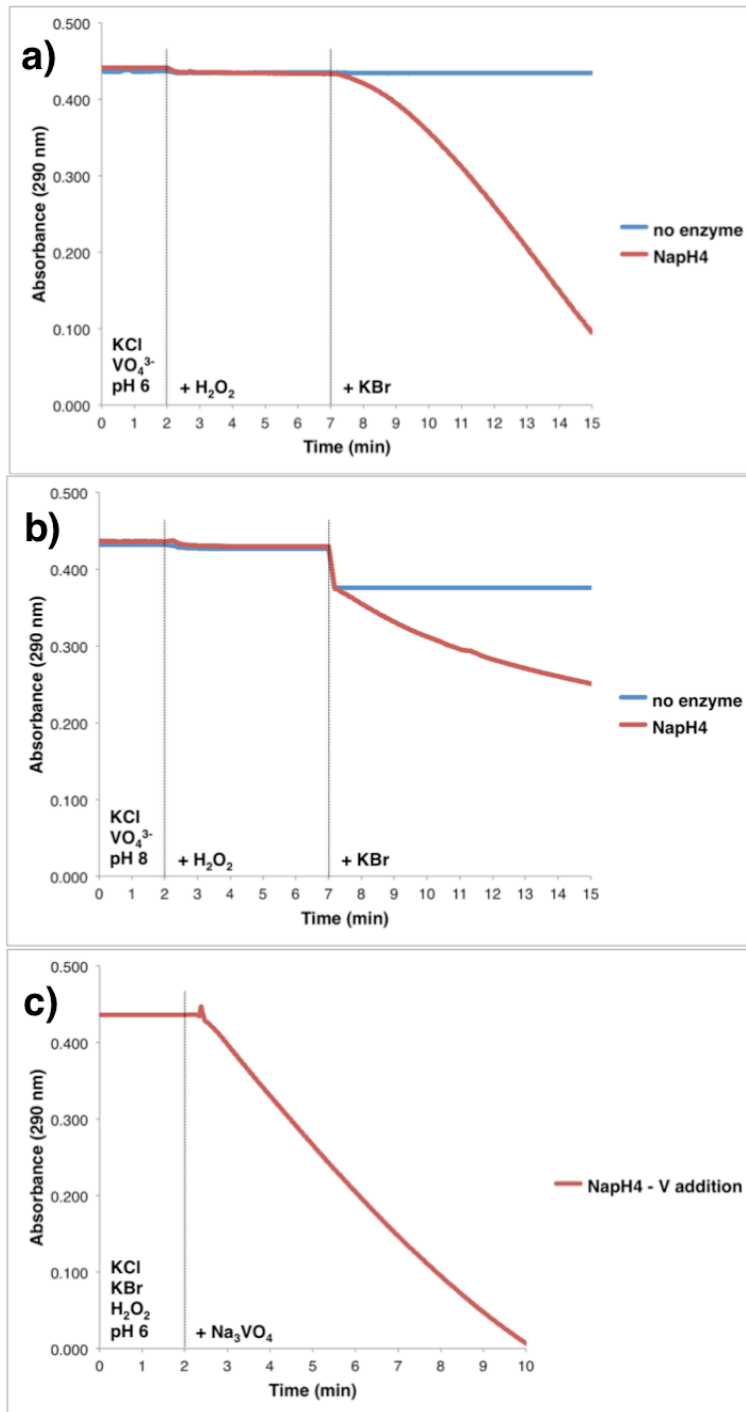

**Figure S3.** Monochlorodimedone assays on recombinant His<sub>6</sub>-NapH4-Strep. Consistent with other characterized *Streptomyces* VCPO enzymes,<sup>3,8</sup> NapH4 shows oxidative activity in this assay only following the addition of bromide ions and at both pH 6.0 (trace a) and pH 8.0 (trace b), albeit at a relatively faster rate at the lower pH. Also consistent with other characterized *Streptomyces* VCPOs, vanadium does not appear to be bound in the active site following heterologous expression, and upon sodium orthovanadate addition to the reaction mixture, negligible time is required to initiate oxidative catalysis (trace c).

**a)** Napyradiomycin B molecules isolated from *Streptomyces ruber* (formerly *Chainia rubra*):

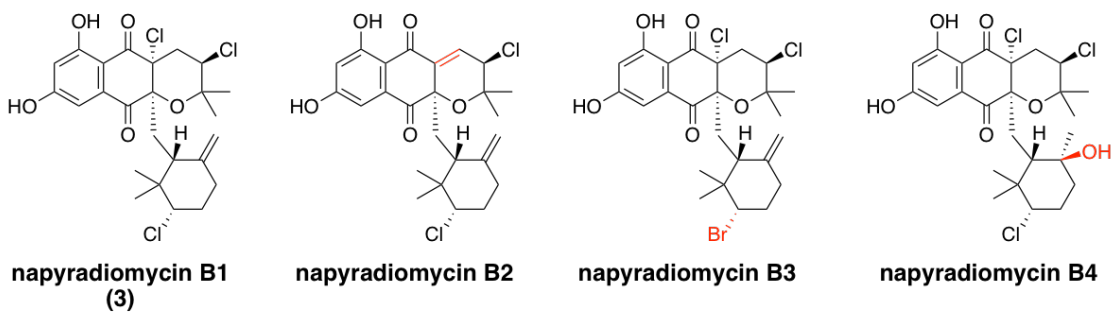

**b)** Napyradiomycins isolated from *Streptomyces* sp. CNQ-525 containing the *nap* gene cluster

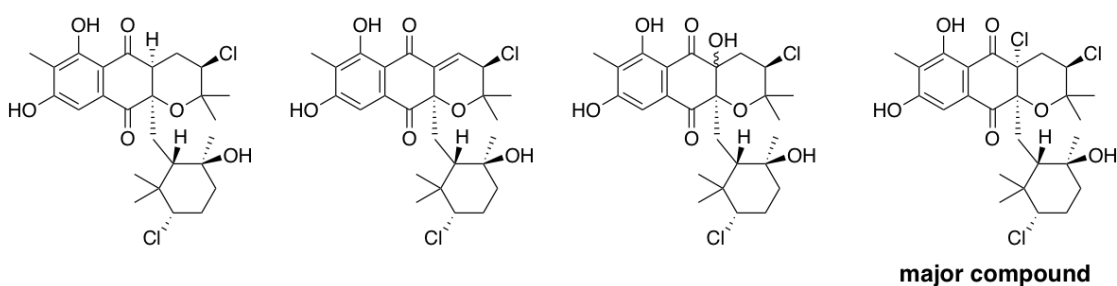

**c)**

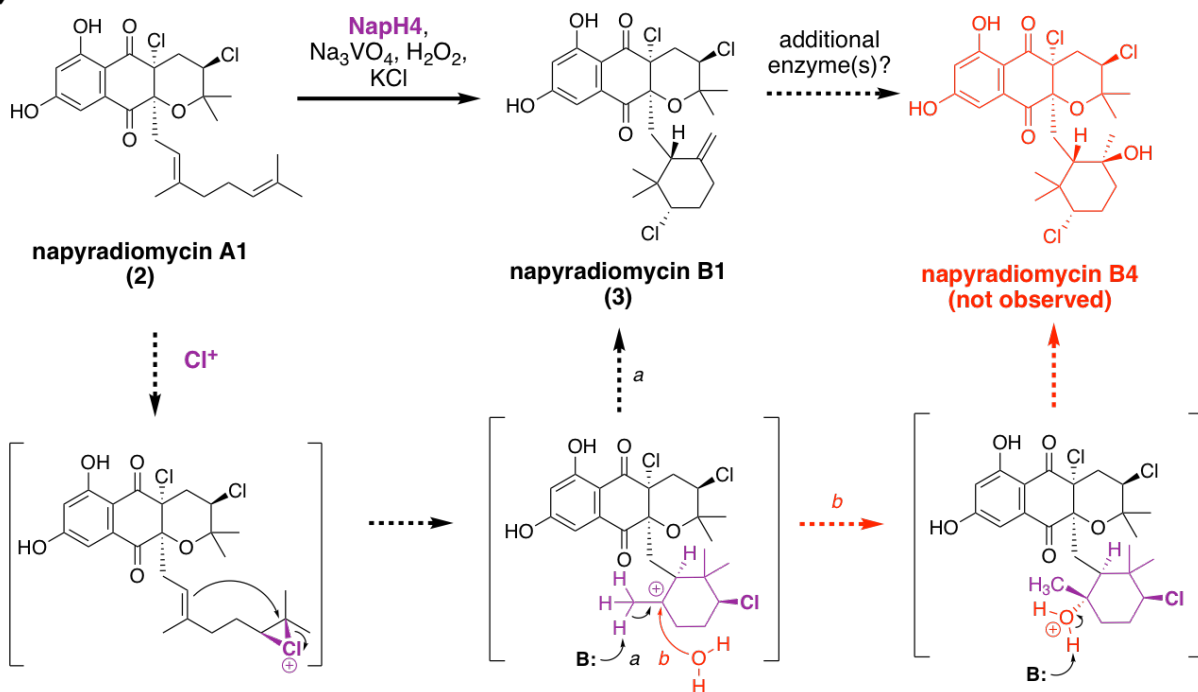

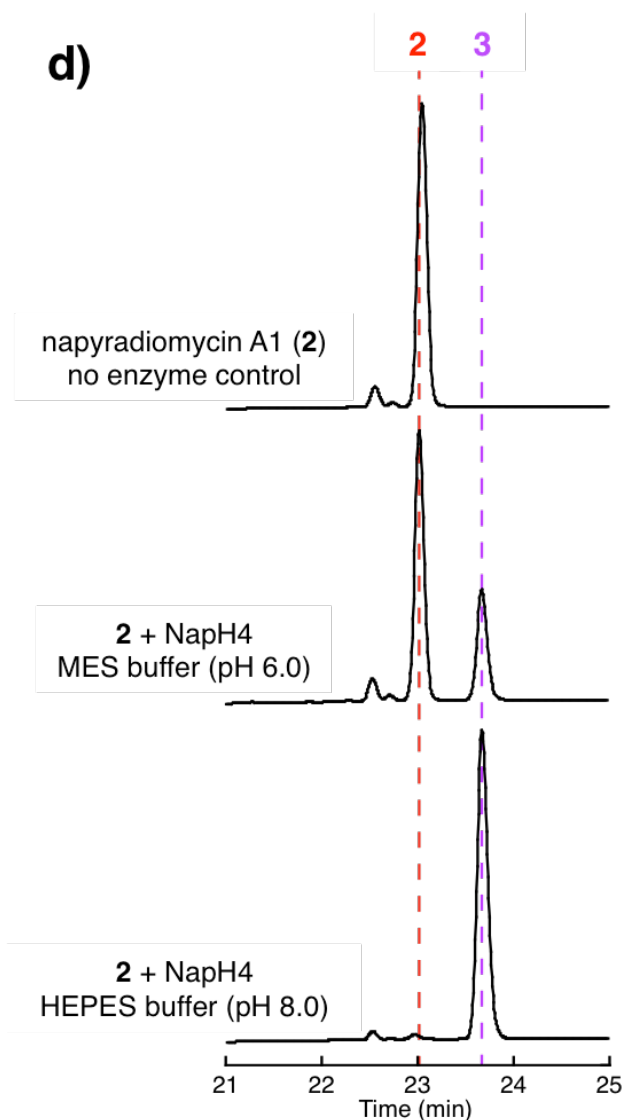

**Figure S4.** Isolated napyradiomycin B molecules with proposed NapH4 mechanism and pH dependence. **a)** Napyradiomycin B molecules isolated from *Streptomyces ruber* (formerly *Chainia rubra*),<sup>9,11</sup> with structural differences from napyradiomycin B1 (**3**) highlighted in red. **b)** Napyradiomycin molecules isolated from *Streptomyces* sp. CNQ-525 from the *nap* biosynthetic gene cluster, with all compounds having a chlorinated cyclohexanol moiety in the formerly geranyl chain.<sup>12</sup> **c)** Proposed NapH4 mechanism for the formation of either napyradiomycin B1 (**3**) or napyradiomycin B4 via chloronium-induced terpenoid cyclization of the geranyl moiety of napyradiomycin A1 (**2**). In our *in vitro* assay conditions, only deprotonation (path a) to **3** instead of hydration (path b) to napyradiomycin B4 was observed. **d)** Reversed-phase HPLC UV chromatograms (254 nm) of a reaction with NapH4 and **2** in either HEPES pH 8.0 or MES pH 6.0 as the buffer. Based on the stop-point assays, the enzyme is more active when assayed at pH 8.0, however the only product observed at either pH is **3**.

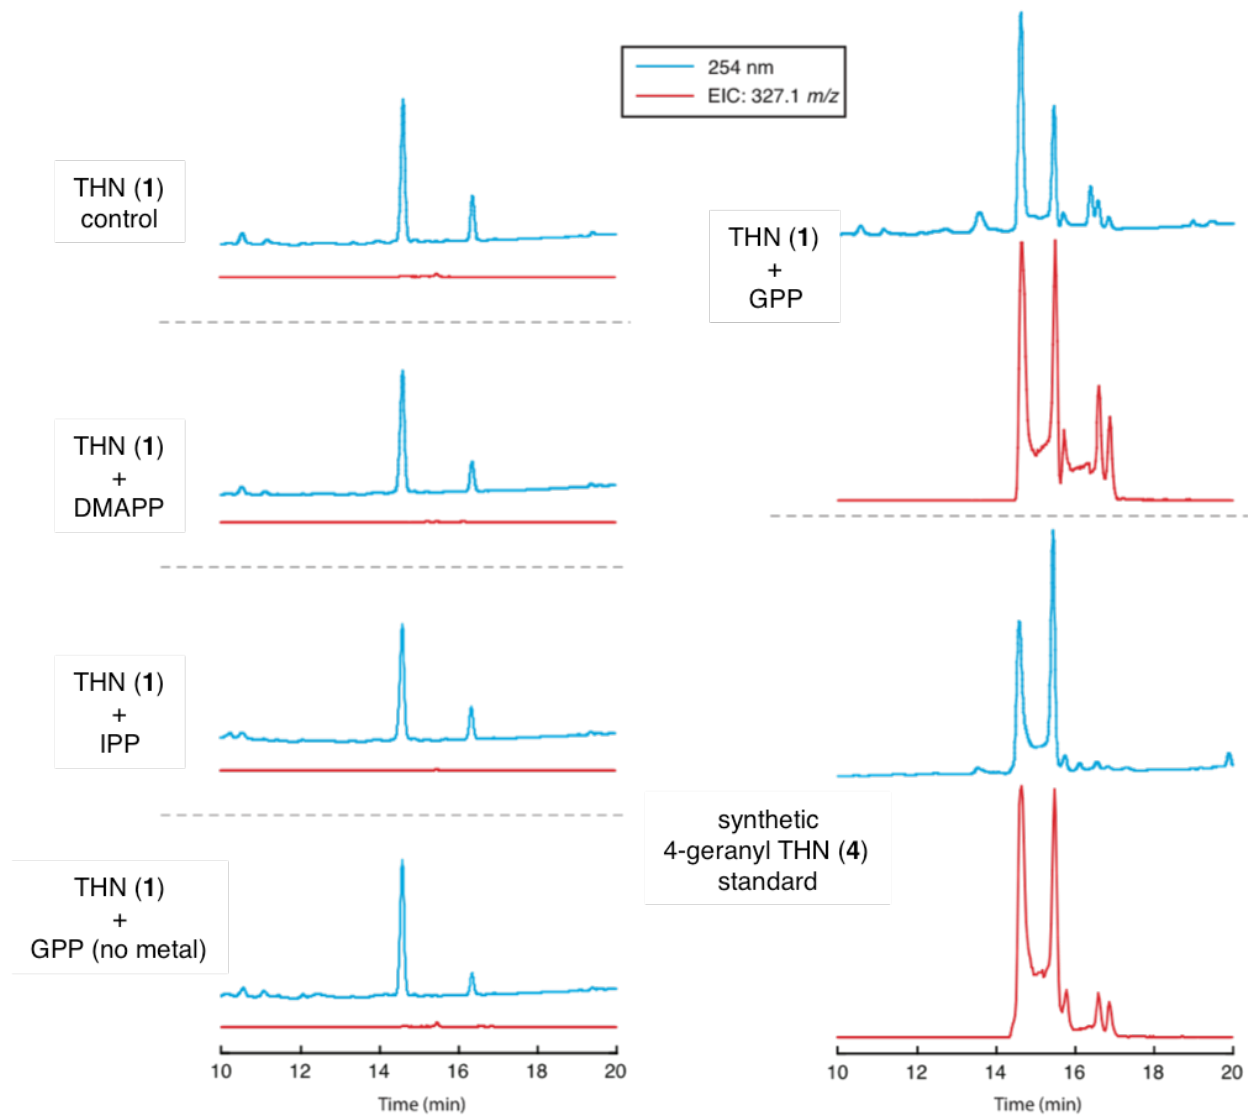

**Figure S5.** NapT9 requirements and substrate specificity. Reversed-phase HPLC UV chromatogram (254 nm, blue trace) and negative mode extracted ion chromatogram ( $[M-H]^-$ :  $327.1 \pm 0.1$   $m/z$ ) of NapT9-catalyzed prenylation of THN (1) when incubated with various isoprenoid pyrophosphates (DMAPP, IPP, or GPP) and in the absence of exogenous  $Mg^{2+}$ , and comparison to synthetic standard 4-geranyl THN (4).

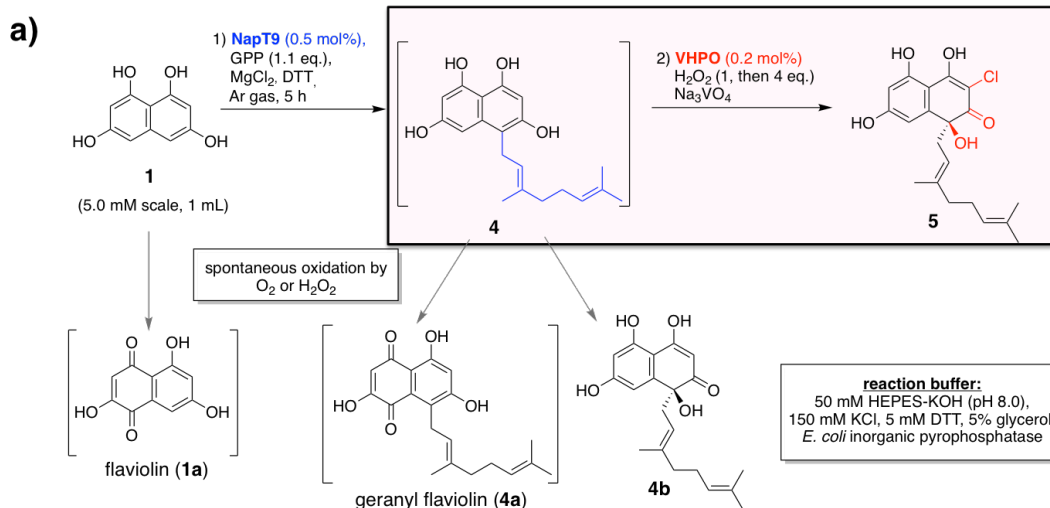

**i) NapH1**

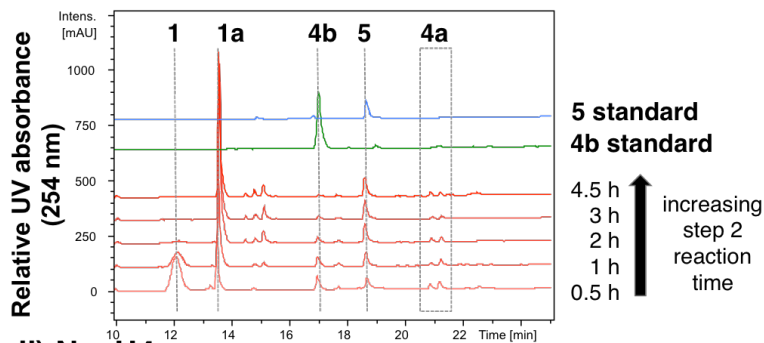

**ii) NapH4**

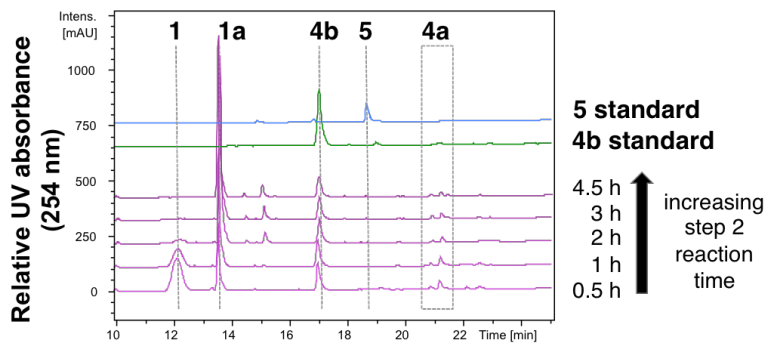

**iii) no enzyme**

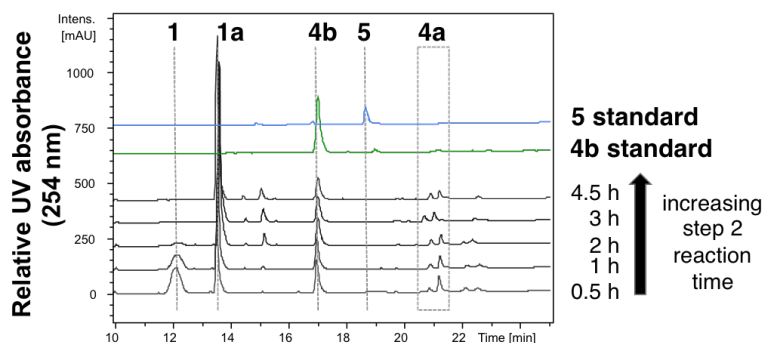

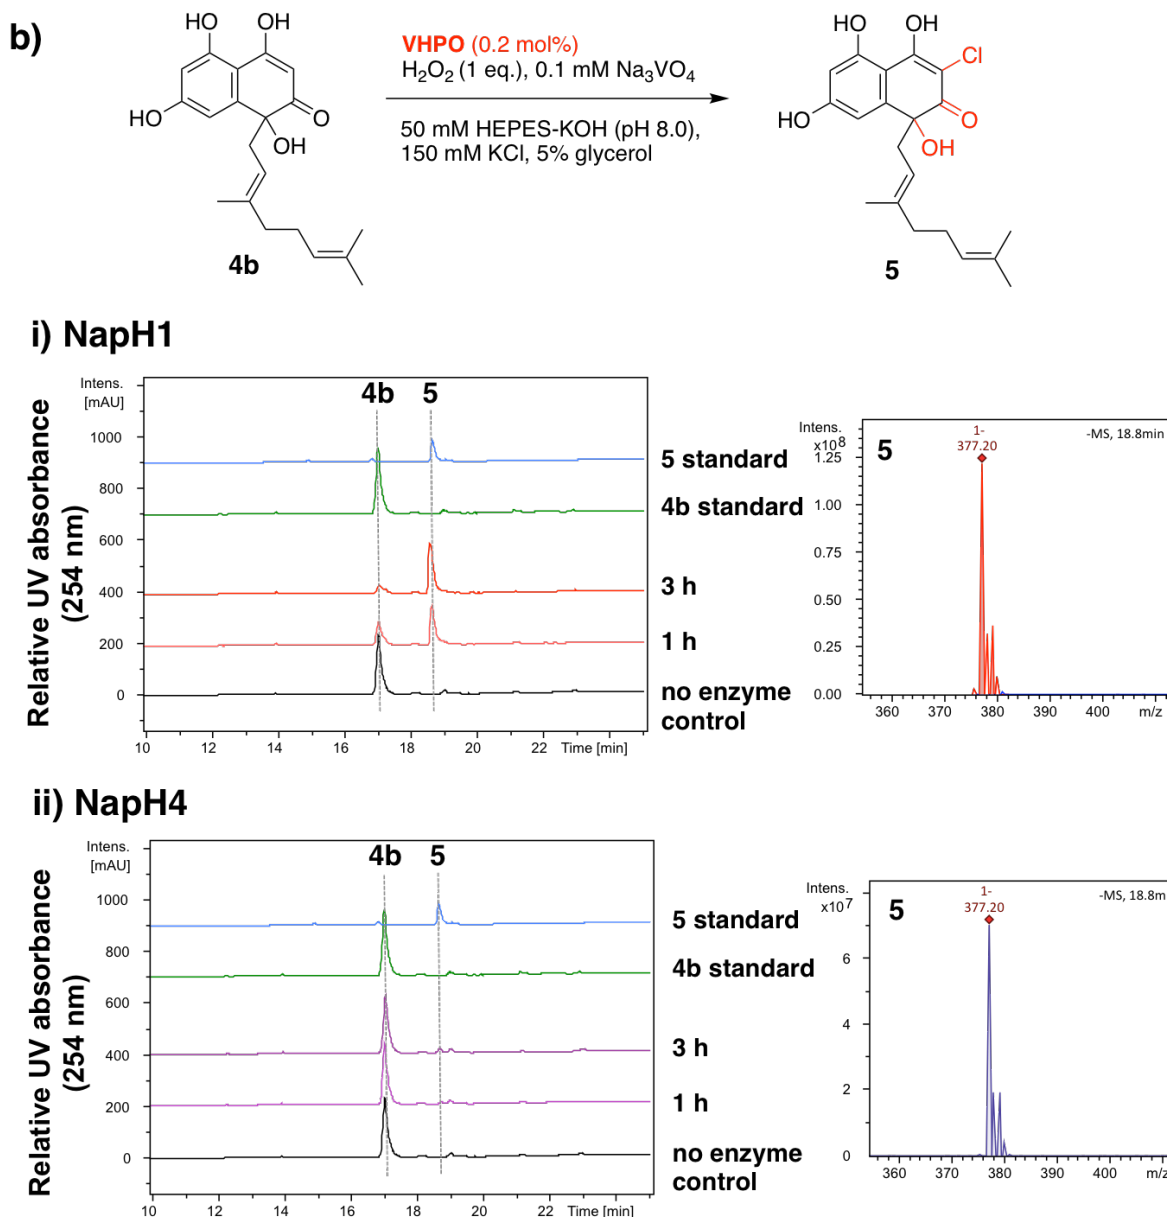

**Figure S6.** Comparison of NapH1 and NapH4 conversion of 4-geranyl THN (**4**) to **5**. **a)** RP-HPLC UV chromatograms (254 nm) of the conversion of *in situ* NapT9-generated **4** into **4a**, **4b**, and **5** over time in the presence of i) NapH1; ii) NapH4; or iii) no VCPO (negative control). The oxidation of **4** to **4a** and **4b** occurs in the presence or absence of VCPO enzyme, indicating a spontaneous conversion under the reaction conditions; however only in the presence of NapH1 is chlorination to **5** observed in any appreciable quantity. **b)** RP-HPLC UV chromatograms (254 cm) of the conversion of synthetic racemic **4b** to **5** over time in the presence of i) NapH1; or ii) NapH4. Although both VCPOs were capable of catalyzing the formation of **5**, NapH1 had a dramatically higher *in vitro* preference for chlorinating **4b** and is therefore believed to be the responsible biosynthetic enzyme for this step.

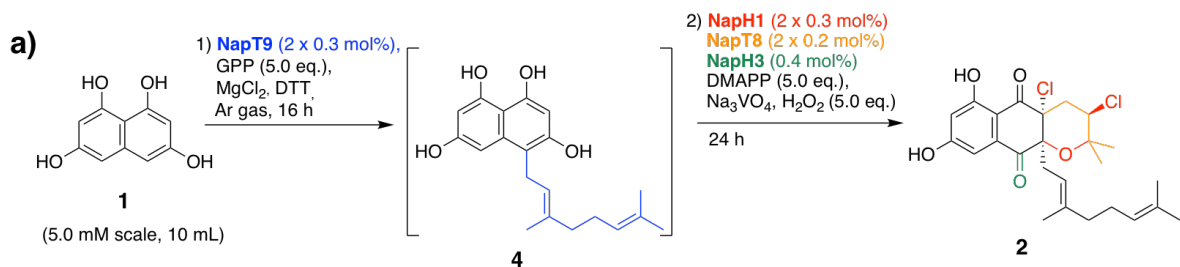

**reaction buffer:**  
50 mM HEPES-KOH (pH 8.0), 150 mM KCl, 5 mM DTT, 5% glycerol

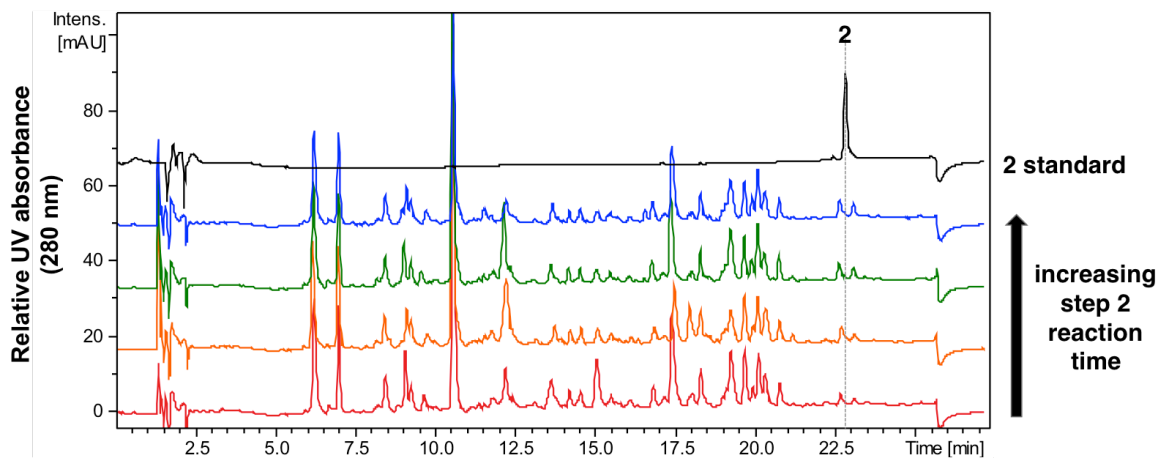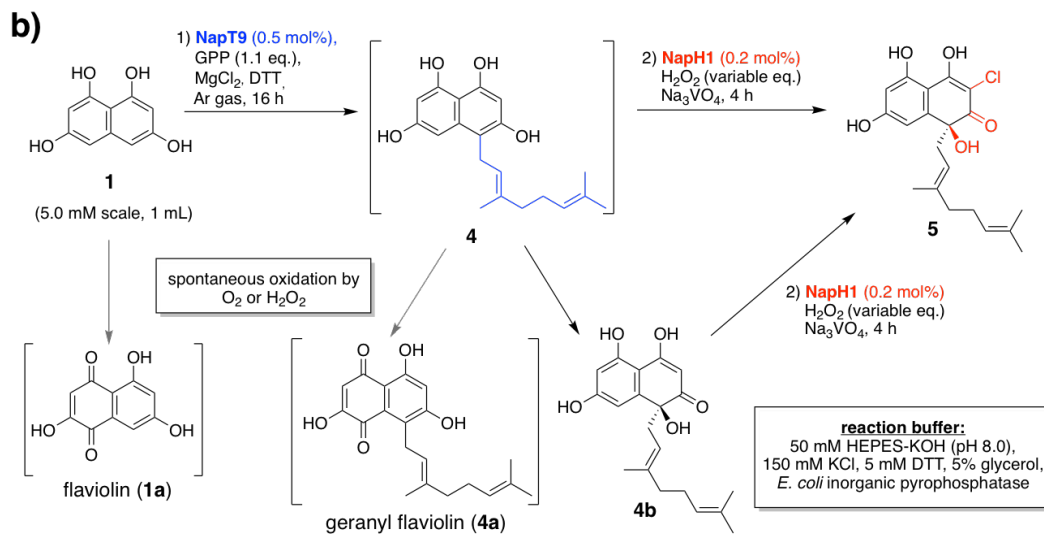



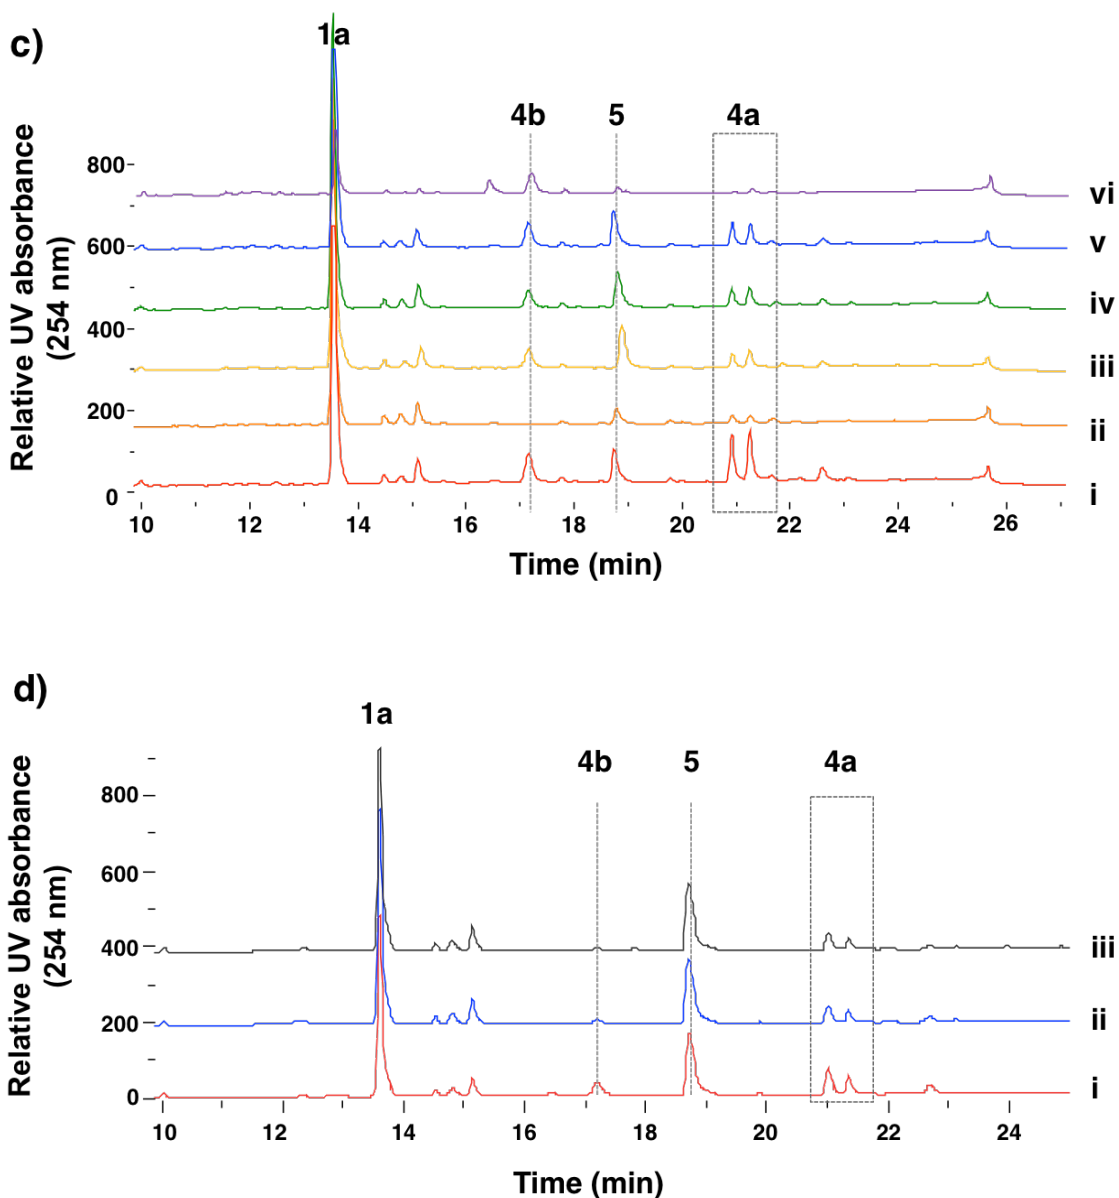

**Figure S7.** One-pot optimization to napyradiomycin molecules and biosynthetic intermediates. **a)** Initial one-pot effort to synthesize napyradiomycin A1 (**2**). Trace amounts of **2** (the right shoulder of the peak at ~22.7 min) were obtained from a complex reaction mixture. **b)** Subsequent optimization strategy of NapT9 and NapH1 steps, to maximize production of **5**, while minimizing oxidized side products flaviolin (**1a**), geranyl flaviolin (**4a**), and des-chlorinated **5** (**4b**). **c)** RP-HPLC chromatograms (254 nm) showing NapT9/NapH1 reaction optimization varying the conditions listed in b) by adding/removing reagents and/or adjusting the quantity or timing of H<sub>2</sub>O<sub>2</sub> addition: **i)** 10 mM H<sub>2</sub>O<sub>2</sub> added at once; **ii)** no DTT in reaction; **iii)** 5 mM H<sub>2</sub>O<sub>2</sub> added, then 5 mM H<sub>2</sub>O<sub>2</sub> added after 30 minutes; **iv)** same conditions as trace iii with added *E. coli* inorganic pyrophosphatase (New England Biolabs); **v)** same as trace iii except NapH1 was pre-incubated with H<sub>2</sub>O<sub>2</sub> before addition; **vi)** 5 mM *tert*-butyl hydrogen peroxide (TBHP) added, then 5 mM TBHP added after 30 minutes. Conditions from (iv) were deemed to be the most appropriate for subsequent optimization. **d)** NapT9/NapH1 reactions varying the quantity of added H<sub>2</sub>O<sub>2</sub>: **i)** 5 mM H<sub>2</sub>O<sub>2</sub>, then 5 mM H<sub>2</sub>O<sub>2</sub> added after 30 minutes; **ii)** 5 mM H<sub>2</sub>O<sub>2</sub>, then 10 mM H<sub>2</sub>O<sub>2</sub> added after 30 minutes; **iii)** 5 mM H<sub>2</sub>O<sub>2</sub>, then 20 mM H<sub>2</sub>O<sub>2</sub> added after 30 minutes. Conditions from (iii) were used for subsequent one-pot optimization of additional Nap enzymes.

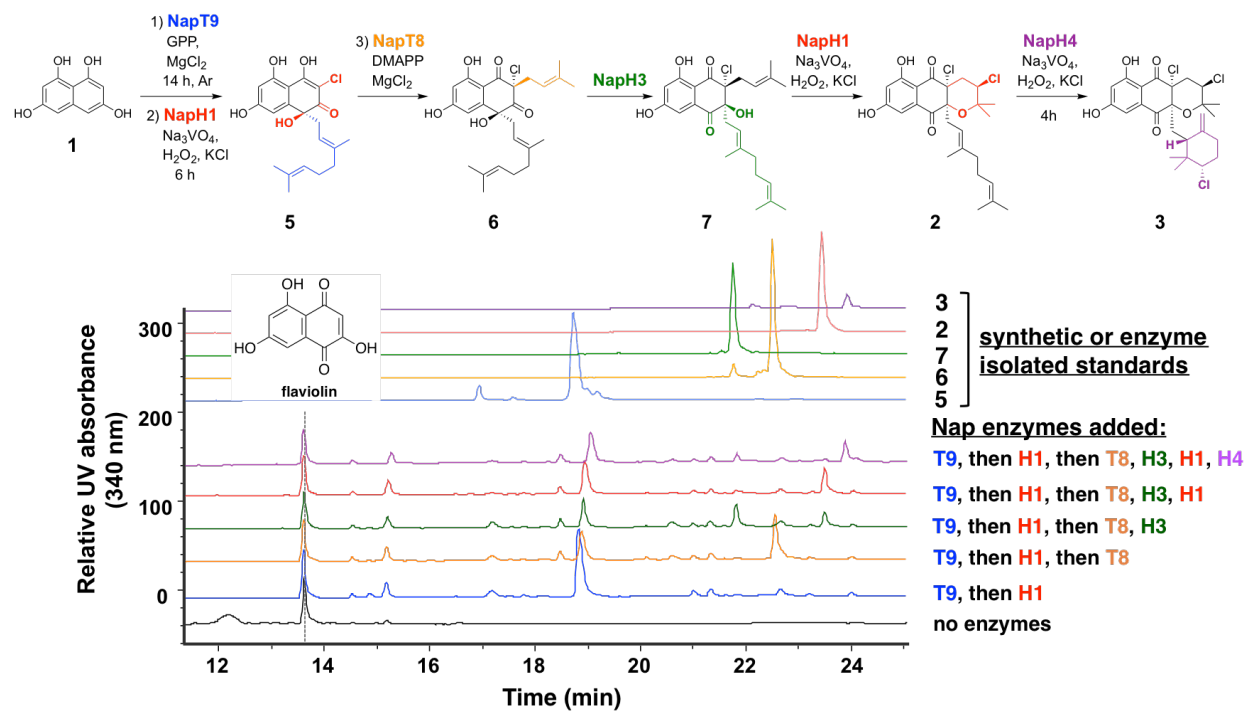

**Figure S8.** Optimized one-pot napyradiomycin biosynthesis and comparison to isolated standards. RP-HPLC chromatograms (340 nm) showing optimized one-pot reactions incorporating up to five napyradiomycin enzymes and comparison to synthetic or enzyme isolated standards of 5, 6, 7, 2, and 3.

**Table S1.** Sequence similarity/identity comparison of napyradiomycin VHPO homologs to other characterized meroterpenoid VHPO enzymes from the merochlorin (Mcl)<sup>13</sup> or marinone (MarH)<sup>3</sup> biosynthetic pathways.

|              | <b>NapH1</b> | <b>NapH3</b> | <b>NapH4</b> | <b>Mcl24</b> <sup>13</sup> | <b>Mcl40</b> <sup>13</sup> | <b>MarH1</b> <sup>3</sup> | <b>MarH2</b> <sup>3</sup> | <b>MarH3</b> <sup>3</sup> |
|--------------|--------------|--------------|--------------|----------------------------|----------------------------|---------------------------|---------------------------|---------------------------|
| <b>NapH1</b> |              | 64/50        | 82/69        | 69/54                      | 77/65                      | 79/64                     | 67/52                     | 68/53                     |
| <b>NapH3</b> | 64/50        |              | 63/49        | 75/61                      | 60/48                      | 65/53                     | 74/64                     | 71/59                     |
| <b>NapH4</b> | 82/69        | 63/49        |              | 67/53                      | 80/67                      | 78/63                     | 64/50                     | 67/53                     |

**Table S2.** Sequence similarity/identity comparison of napyradiomycin aromatic prenyltransferases to other characterized meroterpenoid prenyltransferase enzymes from the merochlorin (Mcl),<sup>13</sup> naphterpin (NphB),<sup>14</sup> marinone (CnqP),<sup>3,15</sup> or furaquinocin (Fur)<sup>16</sup> biosynthetic pathways.

|              | <b>NapT8</b> | <b>NapT9</b> | <b>Mcl23</b> <sup>13</sup> | <b>NphB</b> <sup>14</sup> | <b>CnqP3</b> <sup>3,15</sup> | <b>CnqP4</b> <sup>3,15</sup> | <b>Fur7</b> <sup>16</sup> |
|--------------|--------------|--------------|----------------------------|---------------------------|------------------------------|------------------------------|---------------------------|
| <b>NapT8</b> |              | 61/41        | 54/37                      | 59/39                     | 60/42                        | 59/40                        | 65/46                     |
| <b>NapT9</b> | 61/41        |              | 66/45                      | 55/36                     | 56/38                        | 64/47                        | 60/37                     |

## NMR Data

Labeling scheme used for napyradiomycin compounds based on that used in the original isolation paper.<sup>9</sup>

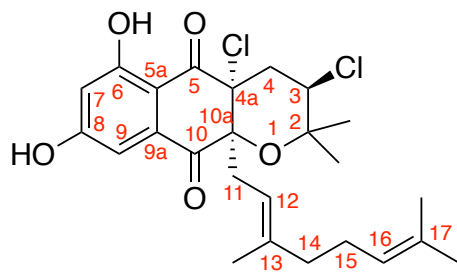

**2**

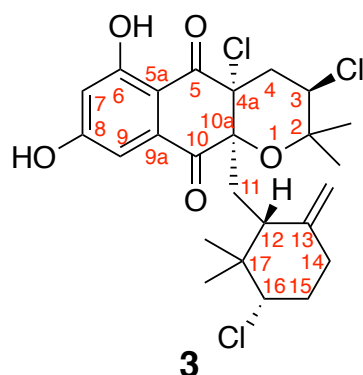

**3**

**Table S3.** <sup>1</sup>H NMR comparison of one-pot enzymatically produced napyradiomycins A1 (**2**) and B1 (**3**) with naturally isolated compounds.

| <u>Assignment</u>                       | <b>2</b>                                            | <u>natural 2</u> <sup>9</sup>                       | <b>3</b>                                                        | <u>natural 3</u> <sup>9</sup>                                                      |
|-----------------------------------------|-----------------------------------------------------|-----------------------------------------------------|-----------------------------------------------------------------|------------------------------------------------------------------------------------|
| <b>2-CH<sub>3</sub></b>                 | 1.51, s                                             | 1.50, s                                             | 1.38, s                                                         | 1.37, s                                                                            |
| <b>2-CH<sub>3</sub></b>                 | 1.18, s                                             | 1.18, s                                             | 1.19, s                                                         | 1.18, s                                                                            |
| <b>3</b>                                | 4.43, dd<br>(11.7, 4.2)                             | 4.42, dd<br>(11.2, 4.8)                             | 4.45, dd<br>(12.0, 4.0)                                         | 4.44, dd<br>(12.0, 4.0)                                                            |
| <b>4</b>                                | 2.48, dd<br>(14.2, 4.3)<br>2.42, dd<br>(14.2, 11.7) | 2.48, dd<br>(14.0, 4.8)<br>2.41, dd<br>(14.0, 11.2) | 2.52, dd<br>(14.1, 3.9)<br>2.35, dd<br>(14.1, 12.0)             | 2.52, dd<br>(13.6, 4.0)<br>2.34, dd<br>(13.6, 12.0)                                |
| <b>6-OH</b>                             | 11.83, s                                            | 11.84, s                                            | 12.04, s                                                        | -                                                                                  |
| <b>7</b>                                | 6.70, d<br>(2.4)                                    | 6.73, d<br>(2.4)                                    | 6.73, d<br>(2.5)                                                | 6.72, br s                                                                         |
| <b>8-OH</b>                             | 6.14, br s                                          | 3.6, ^ br s                                         | 7.10, br s                                                      | -                                                                                  |
| <b>9</b>                                | 7.16, d<br>(2.5)                                    | 7.22, d<br>(2.4)                                    | 7.14, d<br>(2.5)                                                | 7.14, br s                                                                         |
| <b>11</b>                               | 2.70, d<br>(8.2)                                    | 2.70, br d<br>(8.0)                                 | 2.64, <sup>#</sup> dd<br>(15.5, 8.7)<br>1.61, d<br>(15.2)       | 1.99, <sup>#</sup> br d<br>(8.4)<br>1.61, br d<br>(15.6)                           |
| <b>12</b>                               | 4.71, t<br>(7.9)                                    | 4.70, br t<br>(8.0)                                 | 1.99, <sup>#</sup> d<br>(8.6)                                   | 2.64, <sup>#</sup> dd<br>(15.6, 8.4)                                               |
| <b>13-CH<sub>3</sub>/CH<sub>2</sub></b> | 1.32, s                                             | 1.31, s                                             | 4.78, d<br>(1.4)<br>4.75, s                                     | 4.78, s<br><br>4.75, s                                                             |
| <b>14</b>                               | 1.67-1.60, m                                        | 1.6, m                                              | 2.24, ddd<br>(13.2, 4.2, 4.2)<br>1.94, ddd<br>(13.3, 13.3, 4.9) | 2.25, ddd<br>(12.4, 3.6, 3.6)<br>1.93, ddd<br>(12.4, 12.4, 3.6)                    |
| <b>15</b>                               | 1.67-1.60, m                                        | 1.6, m                                              | 2.03, dddd<br>(12.7, 4.6, 3.5,<br>3.5)<br>1.75-1.68, m          | 2.03, dddd<br>(12.4, 4.0, 3.6,<br>3.6)<br>1.72, dddd<br>(12.4, 12.4,<br>11.6, 3.6) |
| <b>16</b>                               | 4.92-4.88, br s                                     | 4.89, br s                                          | 3.80, dd<br>(11.6, 4.4)                                         | 3.78, dd<br>(11.6, 4.0)                                                            |
| <b>17-CH<sub>3</sub></b>                | 1.50, s                                             | 1.50, s                                             | 0.58, s                                                         | 0.57, s                                                                            |
| <b>17-CH<sub>3</sub></b>                | 1.63, s                                             | 1.62, s                                             | 0.71, s                                                         | 0.69, s                                                                            |

NMR experiments run in CDCl<sub>3</sub>

^8-OH 6.21 in synthetic reference<sup>17</sup>

# misassignment in original isolation reference<sup>9</sup>

**Table S4.**  $^{13}\text{C}$  NMR chemical shift comparisons of enzymatically produced napyradiomycins A1 (**2**) and B1 (**3**) with naturally isolated compounds.

| <b>Assignment</b>                       | <b>2</b> | <b>natural 2<sup>9</sup></b> | <b>3</b> | <b>natural 3<sup>9</sup></b> |
|-----------------------------------------|----------|------------------------------|----------|------------------------------|
| <b>2</b>                                | 78.7     | (79.0)                       | 78.8     | (80.9)                       |
| <b>2-CH<sub>3</sub></b>                 | 28.9     | 28.8                         | 28.9     | 29.0                         |
| <b>2-CH<sub>3</sub></b>                 | 22.4     | 22.3                         | 22.4     | 22.4                         |
| <b>3</b>                                | 58.8     | 58.8                         | 58.6     | 58.7                         |
| <b>4</b>                                | 42.8     | 42.8                         | 42.6     | 42.7                         |
| <b>4a</b>                               | 78.9     | (78.8)                       | 80.8     | (78.8)                       |
| <b>5</b>                                | 193.7    | (193.7)                      |          | (193.5)                      |
| <b>5a</b>                               | 110.3    | 110.2                        | 108.9    | 108.8                        |
| <b>6</b>                                | 164.5    | (163.9)                      | 164.9    | (164.2)                      |
| <b>7</b>                                | 109.4    | 109.6                        | 109.4    | 109.5                        |
| <b>8</b>                                | 163.4    | (164.8)                      | 164.1    | (165.5)                      |
| <b>9</b>                                | 107.5    | 107.8                        | 108.4    | 108.5                        |
| <b>9a</b>                               |          | 135.3                        |          | 135.1                        |
| <b>10</b>                               | 195.9    | (196.2)                      | 193.5    | (193.8)                      |
| <b>10a</b>                              | 83.5     | 83.6                         | 84.2     | 84.3                         |
| <b>11</b>                               | 41.3     | 41.3                         | 34.8     | 35.6                         |
| <b>12</b>                               | 115.0    | 114.9                        | 45.7     | 45.9                         |
| <b>13</b>                               | 142.9    | 142.8                        | 145.3    | 145.3                        |
| <b>13-CH<sub>3</sub>/CH<sub>2</sub></b> | 16.6     | 16.5                         | 110.3    | 110.2                        |
| <b>14</b>                               | 39.9     | 39.8                         | 35.6     | 35.0                         |
| <b>15</b>                               | 25.6     | 26.0                         | 34.4     | 34.5                         |
| <b>16</b>                               | 123.8    | 123.7                        | 70.8     | 70.7                         |
| <b>17</b>                               | 131.8    | 131.8                        | 41.8     | 41.8                         |
| <b>17-CH<sub>3</sub></b>                | 17.7     | 17.5                         | 15.3     | 15.5                         |
| <b>17-CH<sub>3</sub></b>                | 25.5     | 25.6                         | 26.3     | 26.4                         |

NMR experiments run in  $\text{CDCl}_3$

Carbon signals for enzyme isolated **2** and **3** obtained from HSQC and HMBC experiments.

Numbers in parentheses for natural **2** and **3** indicate unclear assignment<sup>9</sup>

NMR spectra of isolated one-pot enzymatic products:

(*S,E*)-3-chloro-1-(3,7-dimethylocta-2,6-dien-1-yl)-1,4,5,7-tetrahydroxynaphthalen-2(1*H*)-one (**5**)

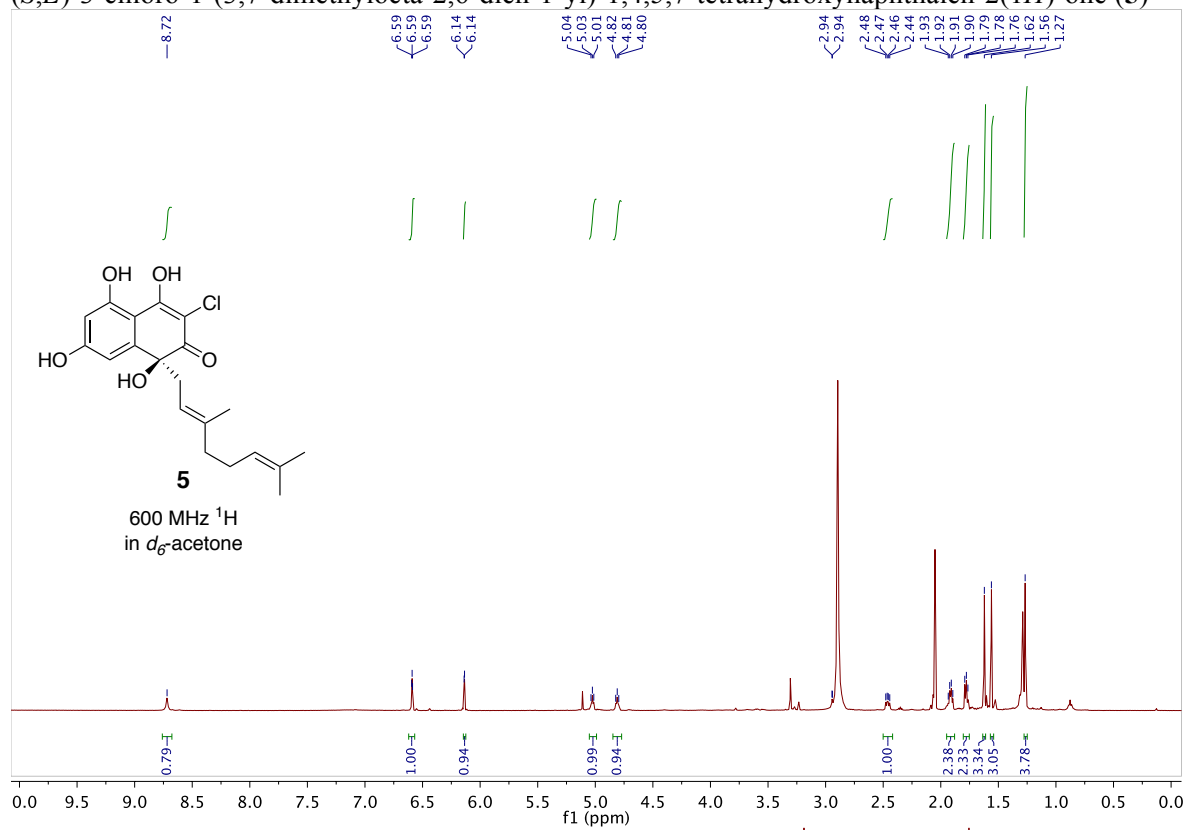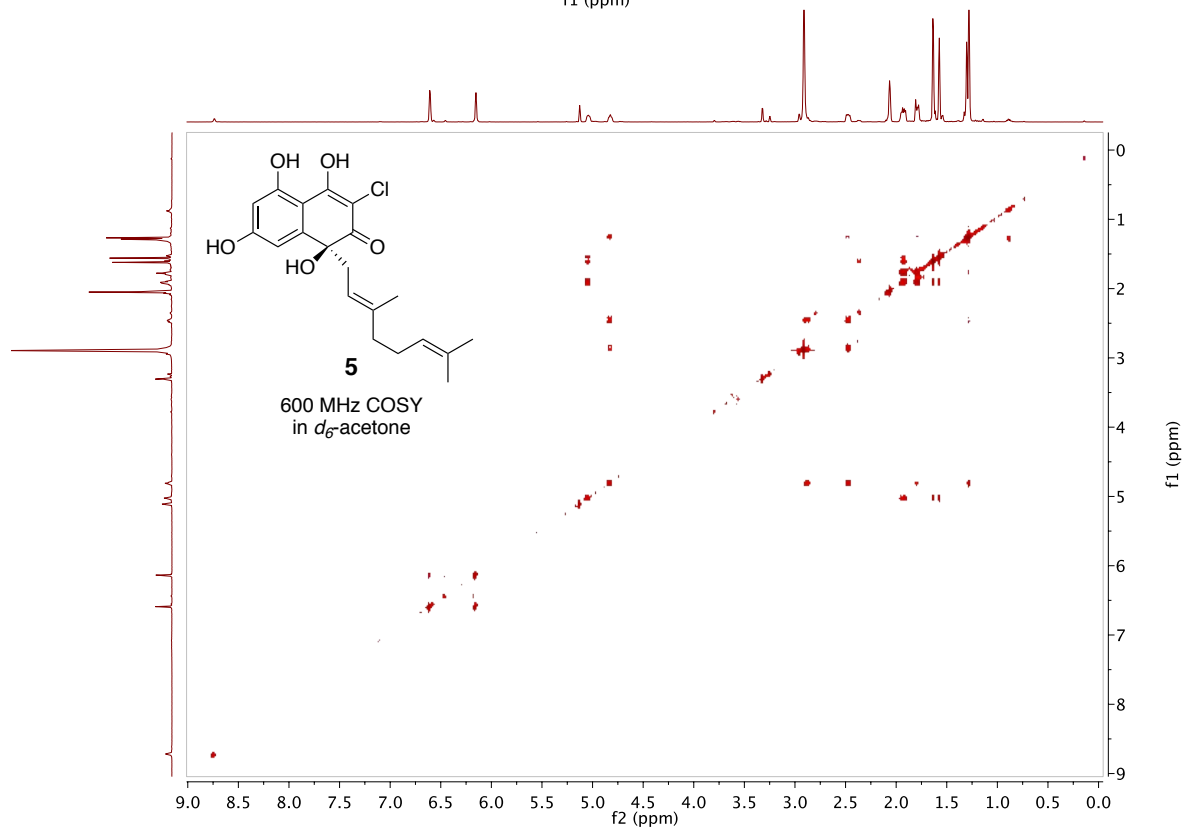

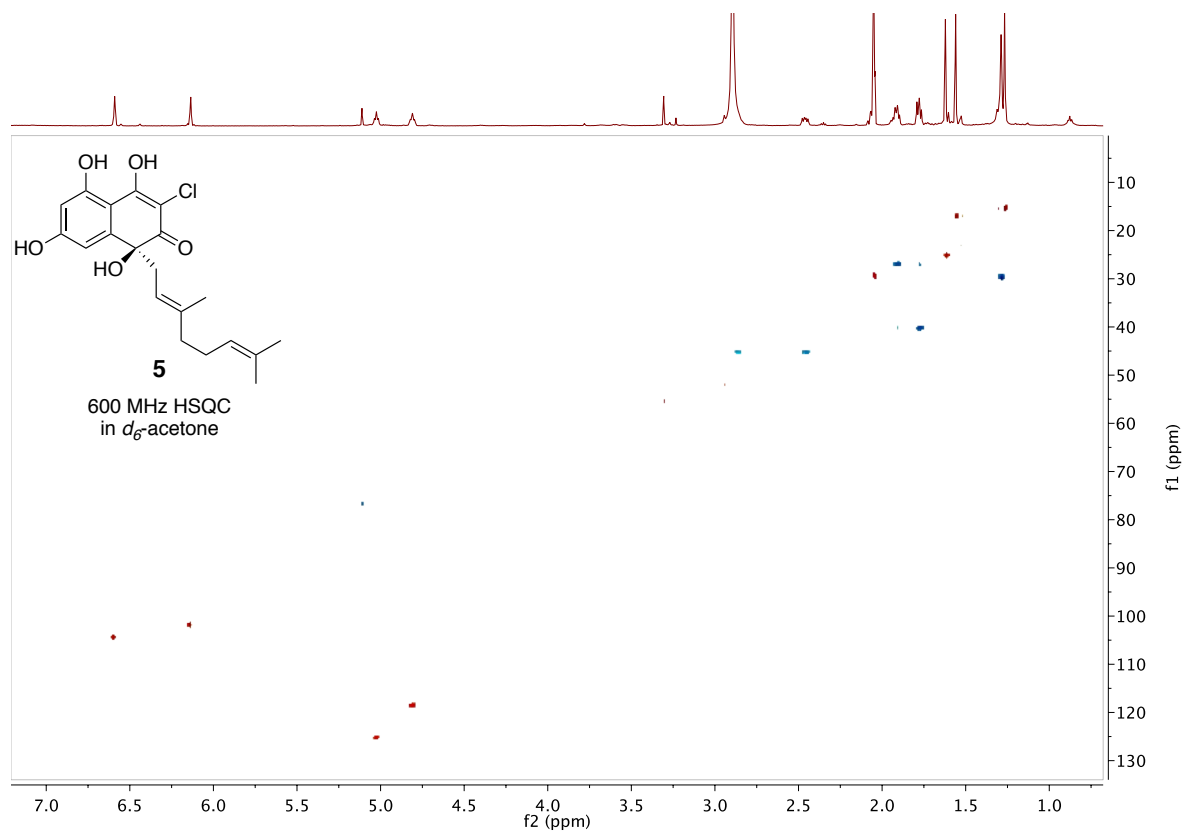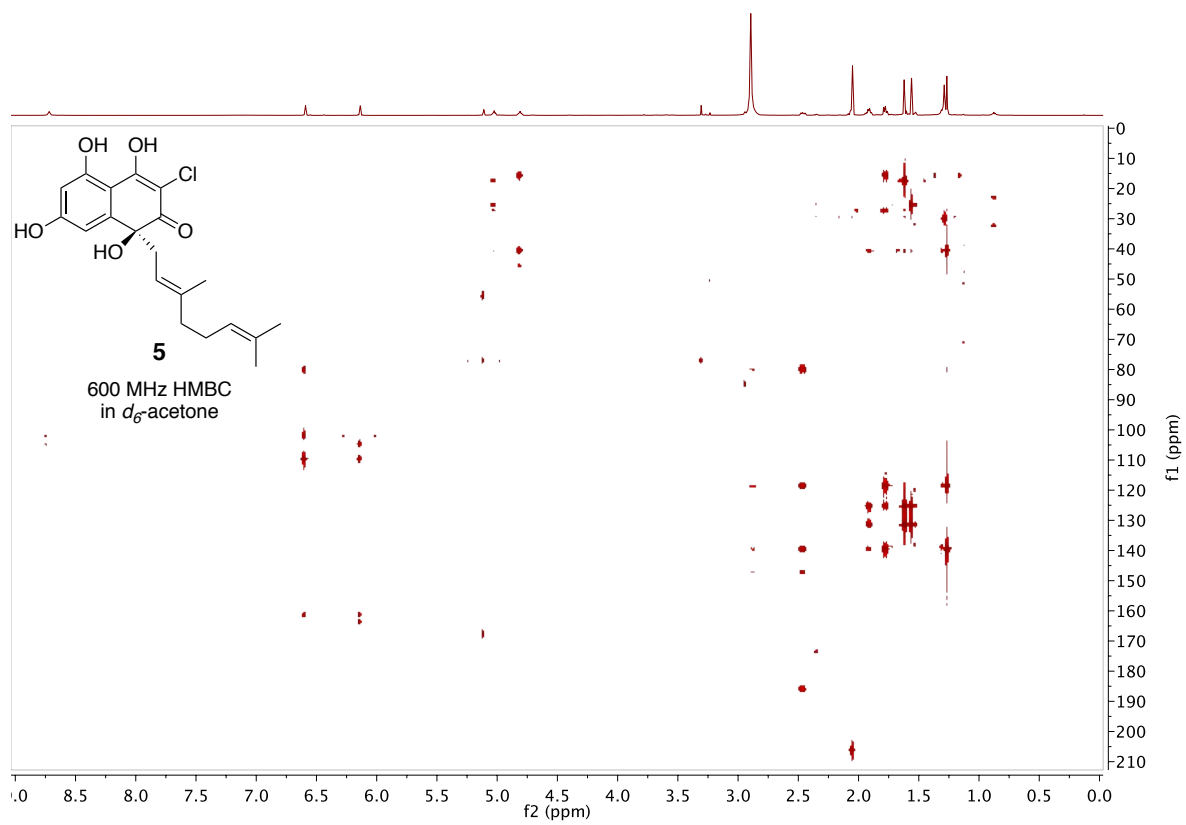



napyradiomycin A1 (**2**)

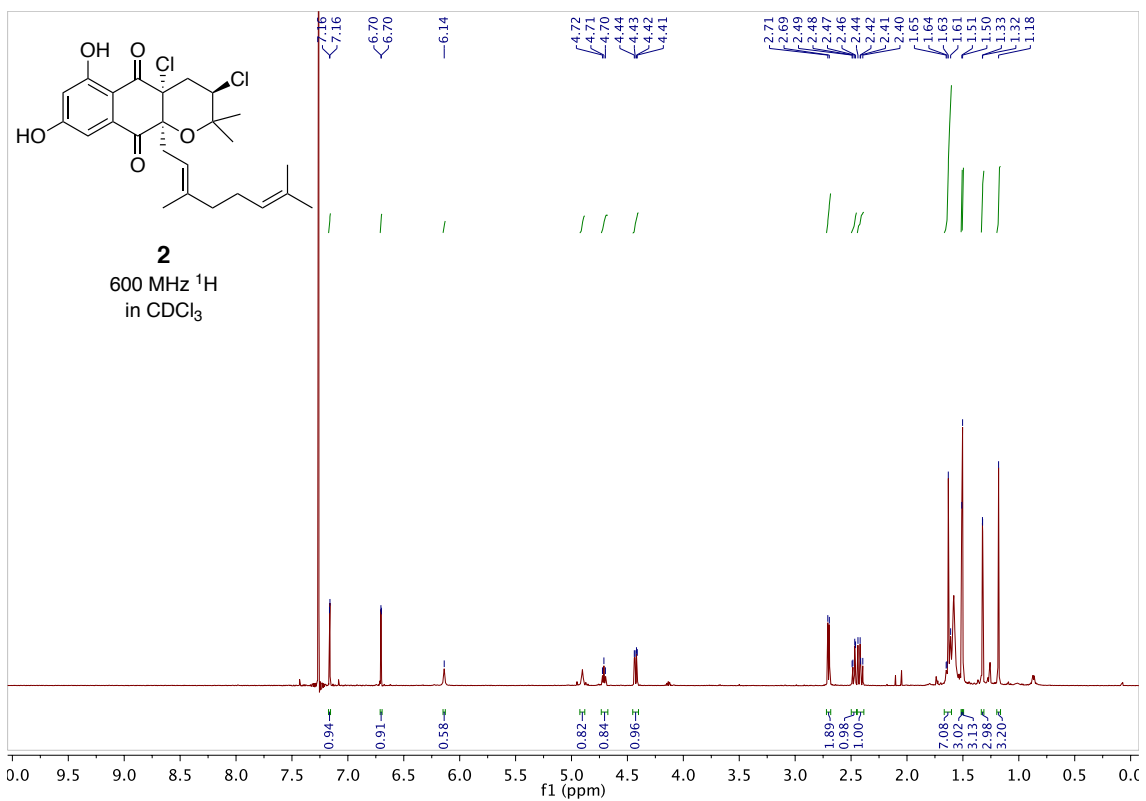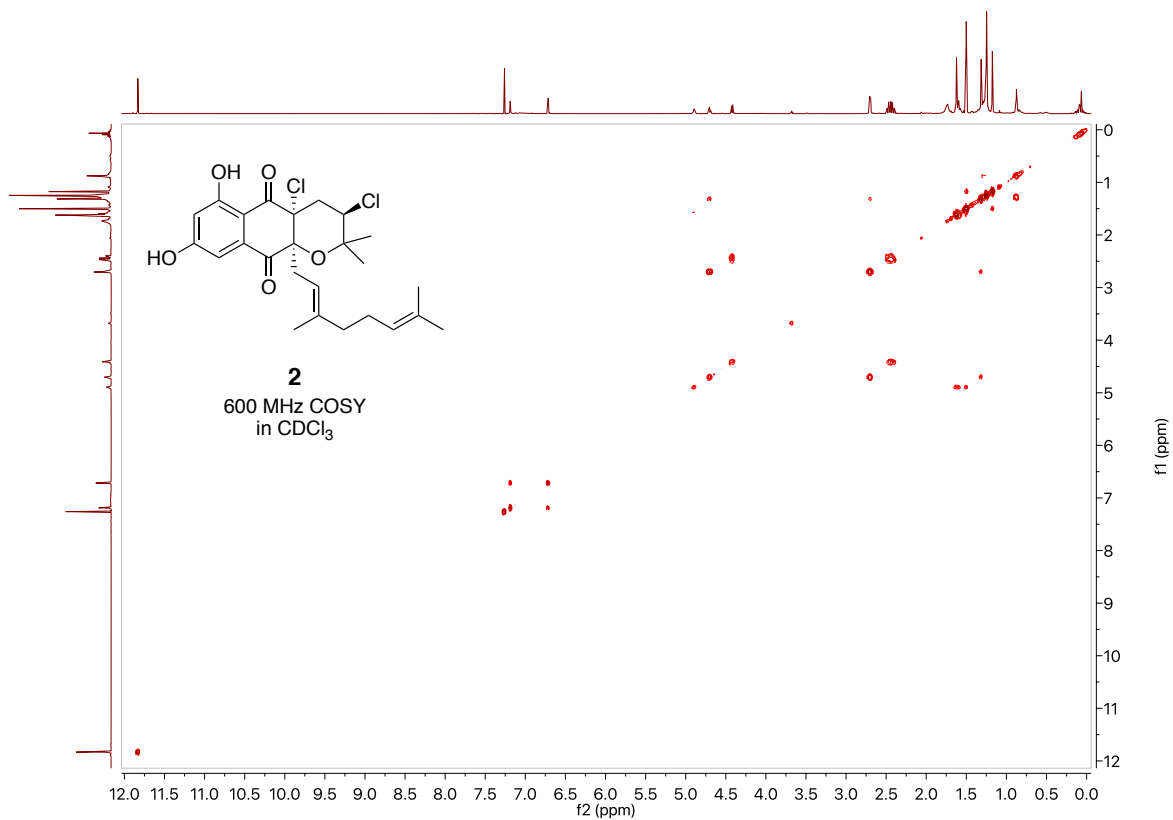

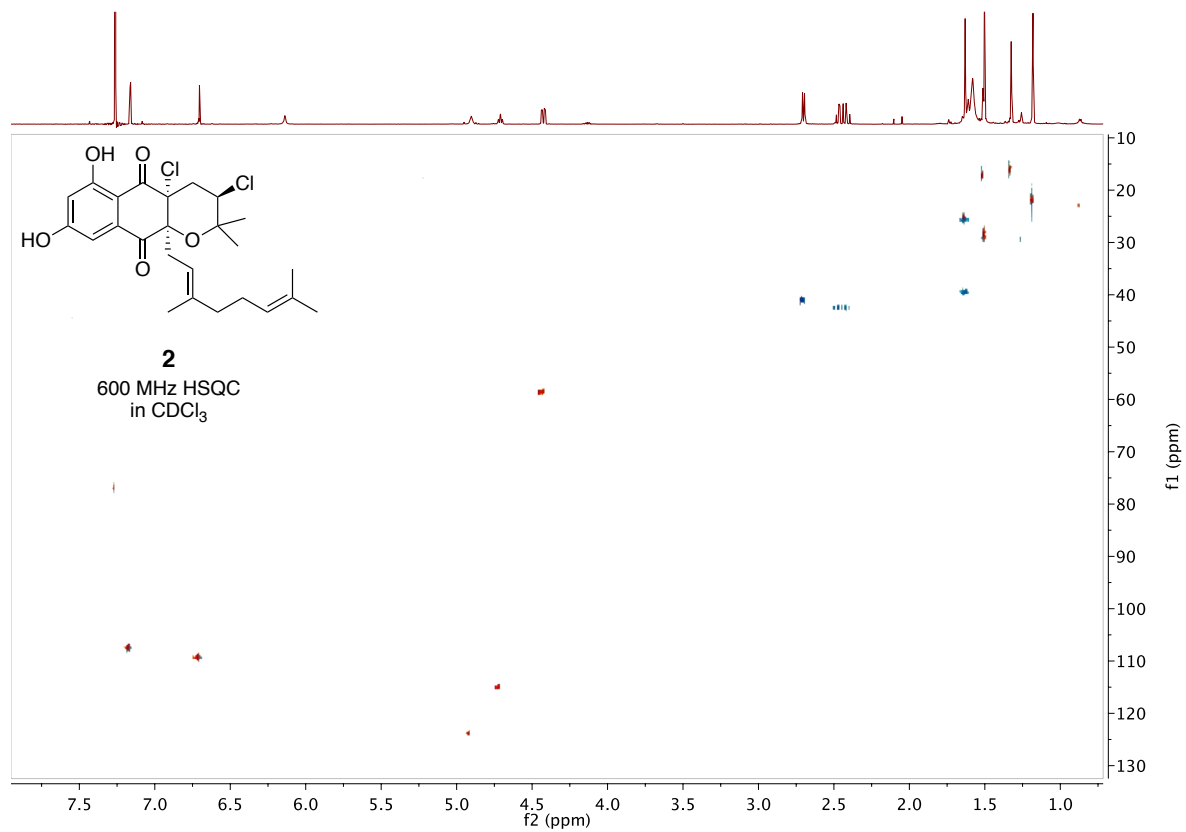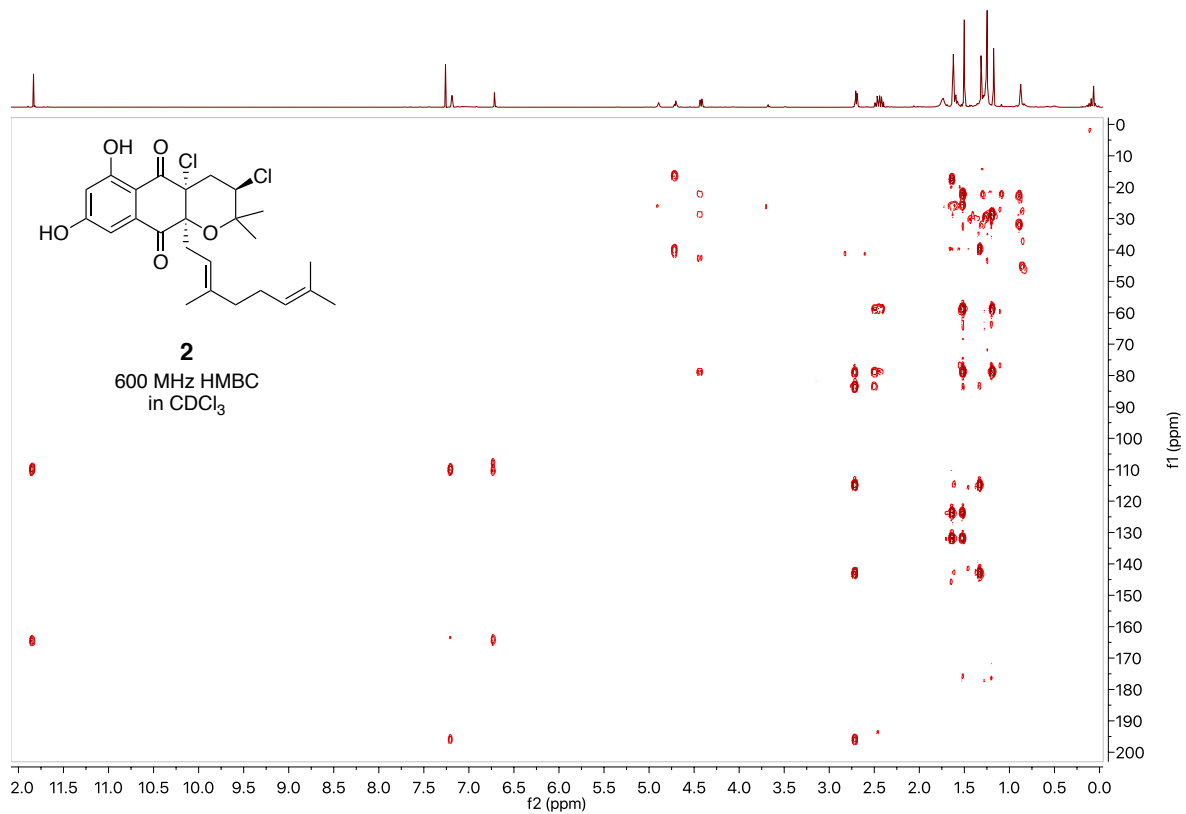

napyradiomycin B1 (**3**)

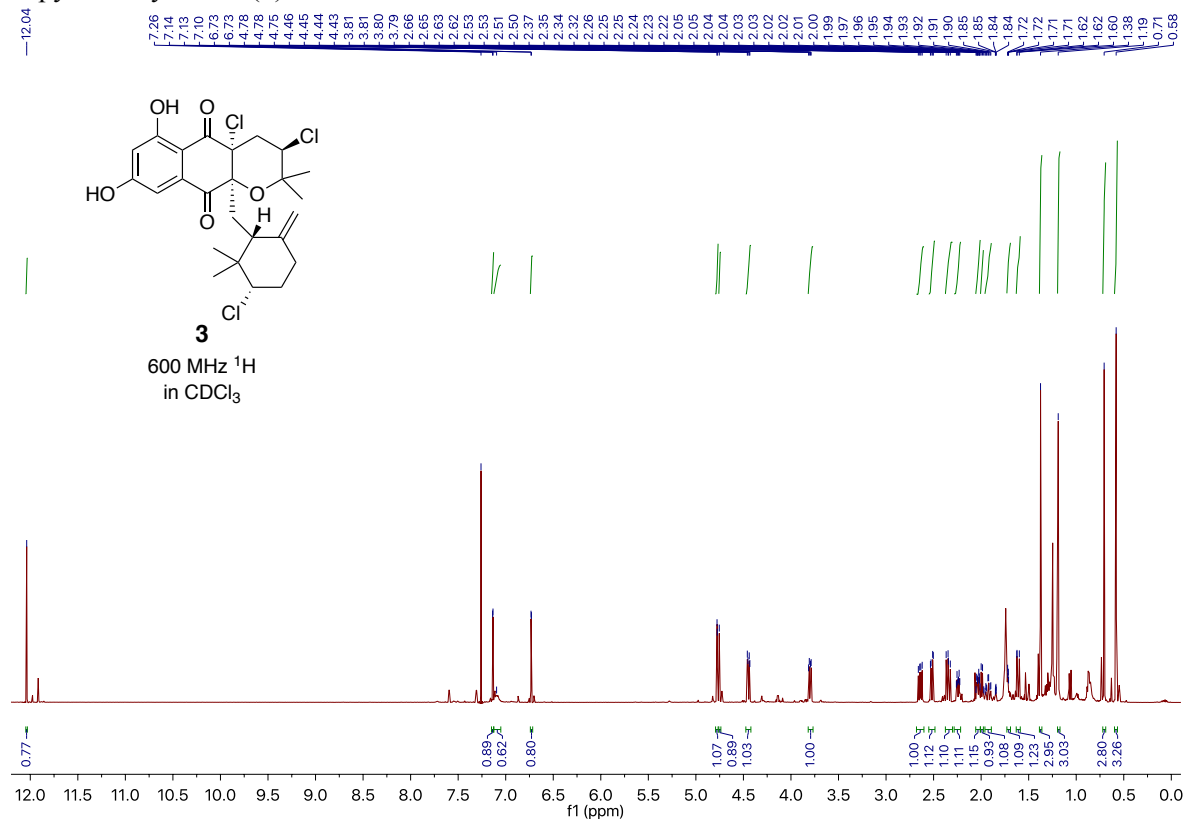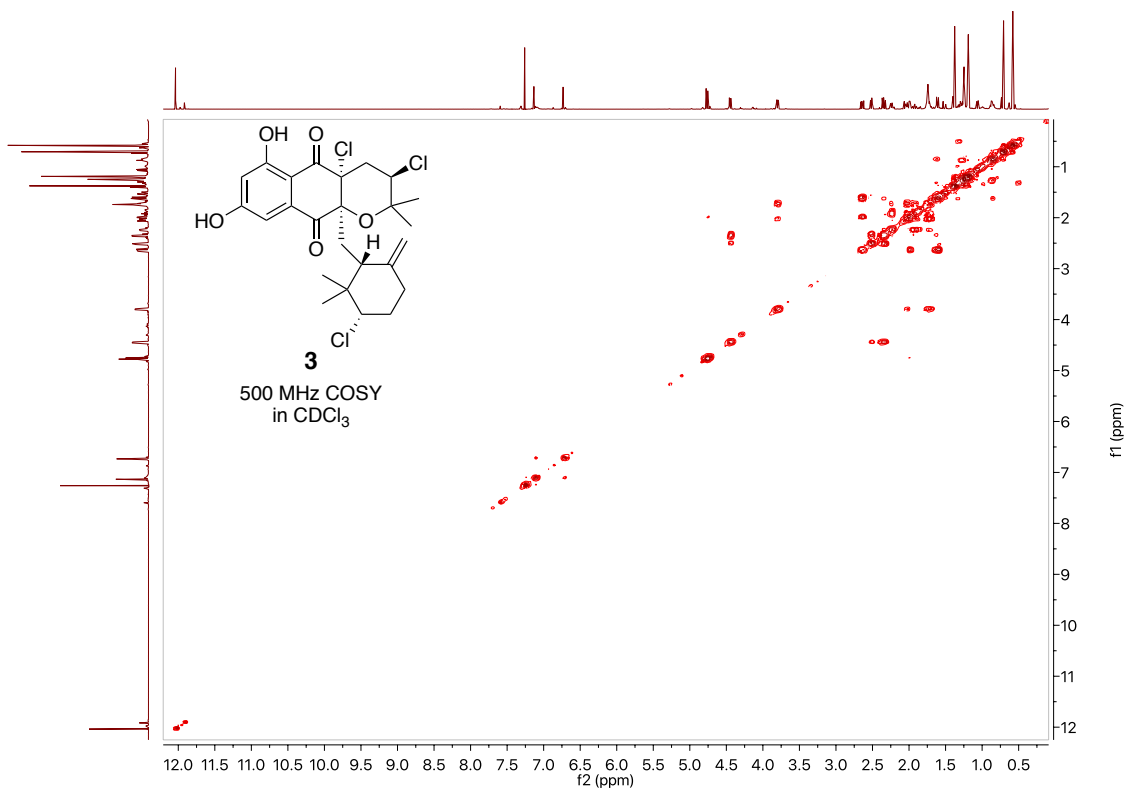

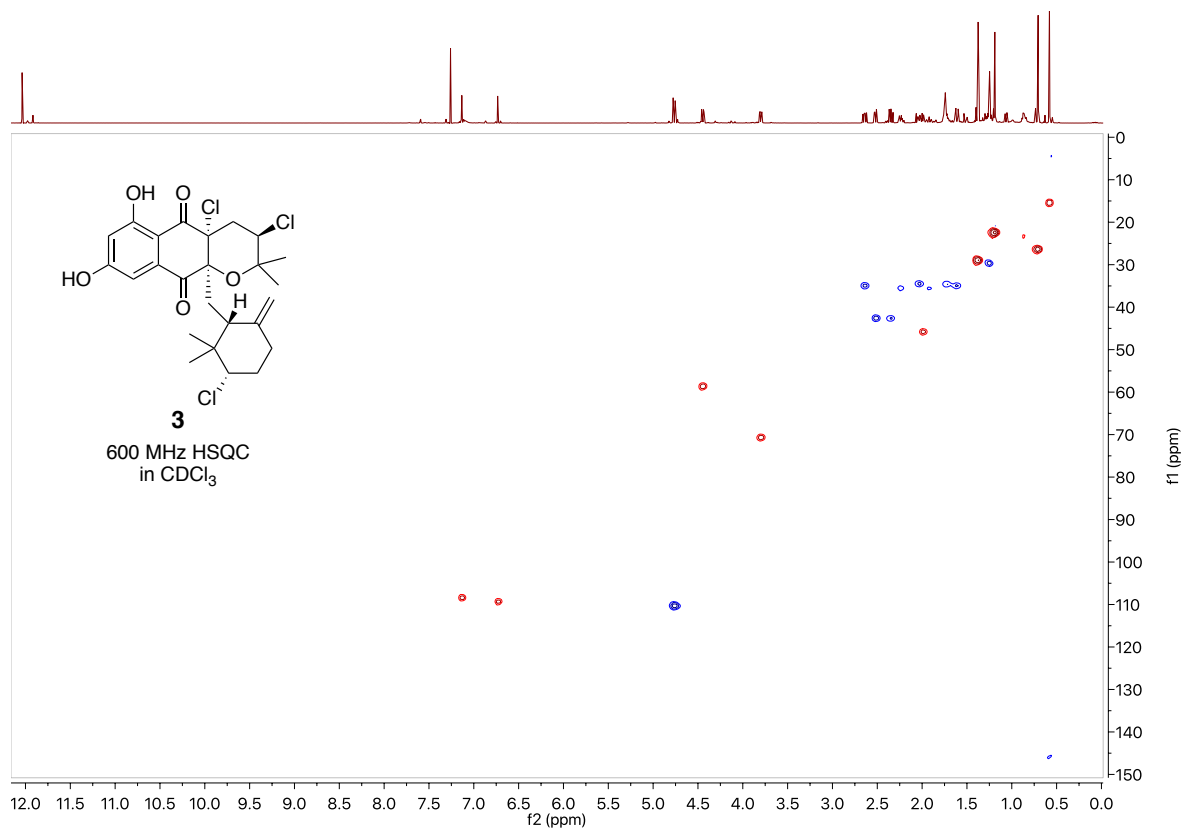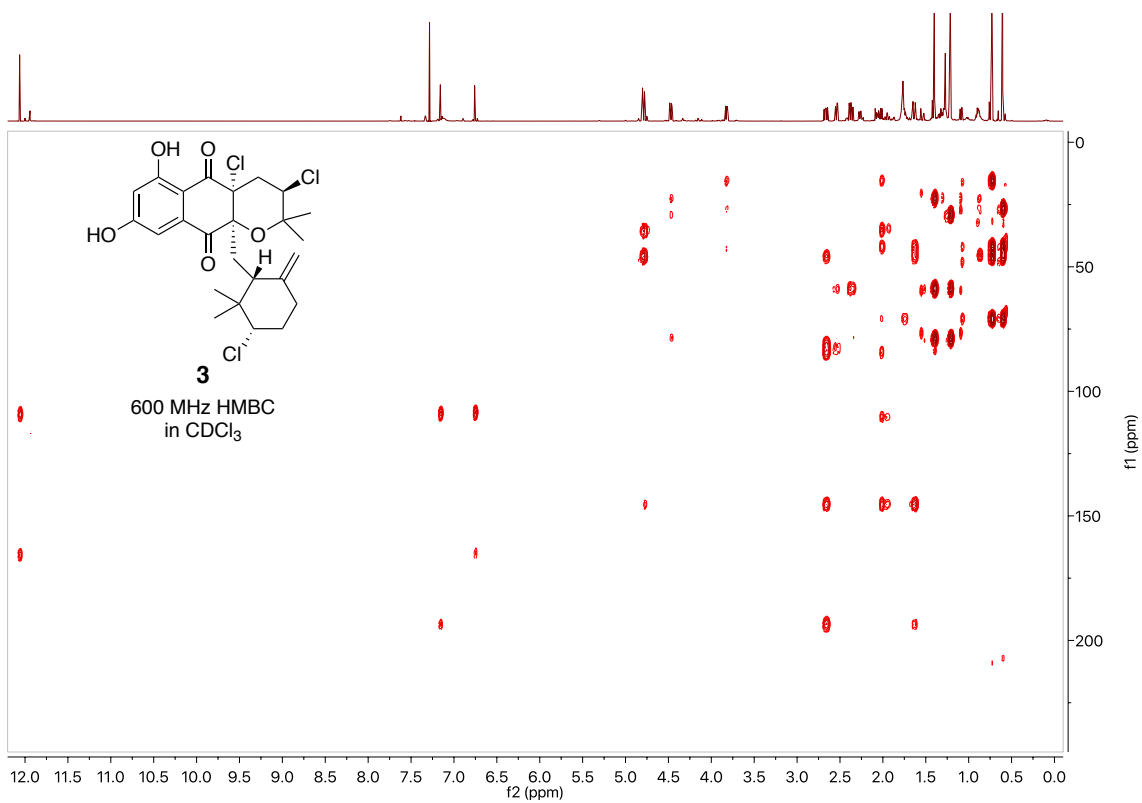

## Supporting Information References:

- (1) Pittelkow, M.; Boas, U.; Christensen, J. B. Carbocations in action. Design, synthesis, and evaluation of a highly acid-sensitive naphthalene-based backbone amide linker for solid-phase synthesis. *Org. Lett.* **2006**, *8*, 5817.
- (2) Woodside, A. B.; Huang, Z.; Poulter, C. D. Trisammonium geranyl diphosphate. *Org. Synth.* **1988**, *66*, 211.
- (3) Murray, L. A. M.; McKinnie, S. M. K.; Pepper, H. P.; Erni, R.; Miles, Z. D.; Cruickshank, M. C.; Lopez-Perez, B.; Moore, B. S.; George, J. H. Total synthesis establishes the biosynthetic pathway to the naphterpin and marinone natural products. *Angew. Chem. Int. Ed.* **2018**, *57*, 11009.
- (4) Miles, Z. D.; Diethelm, S.; Pepper, H. P.; Huang, D. M.; George, J. H.; Moore, B. S. A unifying paradigm for naphthoquinone-based meroterpenoid (bio)synthesis. *Nat. Chem.* **2017**, *9*, 1235.
- (5) Bernhardt, P.; Okino, T.; Winter, J. M.; Miyanaga, A.; Moore, B. S. A stereoselective vanadium-dependent chloroperoxidase in bacterial antibiotic biosynthesis. *J. Am. Chem. Soc.* **2011**, *133*, 4268.
- (6) Yamanaka, K.; Maruyama, C.; Takagi, H.; Hamano, Y. Epsilon-poly-L-lysine dispersity is controlled by a highly unusual nonribosomal peptide synthetase. *Nat. Chem. Biol.* **2008**, *4*, 766.
- (7) Kieser, T.; Bibb, M. J.; Buttner, M. J.; Chater, K. F.; Hopwood, D. A. *Practical Streptomyces Genetics*; The John Innes Foundation: Norwich, UK, 2000.
- (8) McKinnie, S. M. K.; Miles, Z. D.; Moore, B. S. Characterization and biochemical assays of *Streptomyces* vanadium-dependent chloroperoxidases. *Methods Enzymol.* **2018**, *604*, 405.
- (9) Shiomi, K.; Nakamura, H.; Iinuma, H.; Naganawa, H.; Isshiki, K.; Takeuchi, T.; Umezawa, H.; Iitaka, Y. Structures of new antibiotics napyradiomycins. *J. Antibiot.* **1986**, *39*, 494.
- (10) Besemer, J.; Borodovsky, M. GeneMark: web software for gene finding in prokaryotes, eukaryotes and viruses. *Nucleic Acids Res.* **2005**, *33*, W451.
- (11) Shiomi, K.; Nakamura, H.; Iinuma, H.; Naganawa, H.; Takeuchi, T.; Umezawa, H. New antibiotic napyradiomycins A2 and B4 and stereochemistry of napyradiomycins. *J. Antibiot.* **1987**, *40*, 1213.
- (12) Winter, J. M.; Moffitt, M. C.; Zazopoulos, E.; McAlpine, J. B.; Dorrestein, P. C.; Moore, B. S. Molecular basis for chloronium-mediated meroterpene cyclization: cloning, sequencing, and heterologous expression of the napyradiomycin biosynthetic gene cluster. *J. Biol. Chem.* **2007**, *282*, 16362.
- (13) Teufel, R.; Kaysser, L.; Villaume, M. T.; Diethelm, S.; Carbullido, M. K.; Baran, P. S.; Moore, B. S. One-pot enzymatic synthesis of merochlorin A and B. *Angew. Chem. Int. Ed.* **2014**, *53*, 11019.
- (14) Kuzuyama, T.; Noel, J. P.; Richard, S. B. Structural basis for the promiscuous biosynthetic prenylation of aromatic natural products. *Nature* **2005**, *435*, 983.
- (15) Leipoldt, F.; Zeyhle, P.; Kulik, A.; Kalinowski, J.; Heide, L.; Kaysser, L. Diversity of ABBA prenyltransferases in marine *Streptomyces* sp. CNQ-509: Promiscuous enzymes for the biosynthesis of mixed terpenoid compounds. *PLoS One* **2015**, *10*, e0143237.
- (16) Kumano, T.; Tomita, T.; Nishiyama, M.; Kuzuyama, T. Functional characterization of the promiscuous prenyltransferase responsible for furaquinocin biosynthesis: identification of a physiological polyketide substrate and its prenylated reaction products. *J. Biol. Chem.* **2010**, *285*, 39663.
- (17) Tatsuta, K.; Tanaka, Y.; Kojima, M.; Ikegami, H. The first total synthesis of (+/-)-napyradiomycin A1. *Chem. Lett.* **2002**, 14.
